# Supplementary material
Source: MDPI journal article supplement (https://www.mdpi.com/2073-4352/10/7/616)
Supplement: s1 [file s1]

## Supplementary Materials:

### N/N bridge type and substituents effects on chemical and crystallographic properties of Schiff-base (*salen/salphen*) Ni<sup>II</sup> coordination compounds

Cynthia Sinai Novoa-Ramirez<sup>1\*</sup>, Areli Silva-Becerril<sup>1\*</sup>, Fiorella Olivera-Venturo<sup>1,2</sup>, Juan Carlos Garcia-Ramos<sup>1,4</sup>, Marcos Flores-Alamo<sup>3</sup>, Lena Ruiz-Azuara<sup>1\*</sup>.

<sup>1</sup>Department of Inorganic Chemistry, Faculty of Chemistry, Universidad Nacional Autónoma de México, Av. Universidad 3000, Circuito Exterior S/N, Coyoacán, C.P. 04510, Mexico City;

<sup>2</sup>present address: Department of Science, Faculty of Science and Philosophy, Av. Honorio Delgado 430, San Martín de Porres 15102, Perú.

<sup>3</sup>Faculty of Chemistry, Universidad Nacional Autónoma de México, Ciudad Universitaria 3000, 04510 Ciudad de México, México.

<sup>4</sup>Present address: Escuela de Ciencias de la Salud. UABC. Campus Ensenada. Ensenada, Baja California, México.

**Table S1.** Atomic coordinates ( $\times 10^4$ ) and equivalent isotropic displacement parameters ( $\text{\AA}^2 \times 10^3$ ) for compound **NiMesalen**.  $U(\text{eq})$  is defined as one third of the trace of the orthogonalized  $U^{\text{ij}}$  tensor.

|       | x       | y        | z       | U(eq) |
|-------|---------|----------|---------|-------|
| C(1)  | 3492(1) | 9677(3)  | 2525(4) | 30(1) |
| C(2)  | 3813(1) | 8745(3)  | 2604(4) | 32(1) |
| C(3)  | 3456(1) | 7849(3)  | 2637(5) | 45(1) |
| C(4)  | 2808(2) | 7890(3)  | 2566(5) | 51(1) |
| C(5)  | 2483(1) | 8808(3)  | 2466(5) | 44(1) |
| C(6)  | 2828(1) | 9689(3)  | 2442(4) | 37(1) |
| C(7)  | 3814(1) | 10628(3) | 2574(4) | 30(1) |
| C(8)  | 4681(1) | 11765(2) | 2902(4) | 30(1) |
| C(17) | 1769(1) | 8830(3)  | 2393(6) | 59(1) |
| O(1)  | 4431(1) | 8667(2)  | 2671(3) | 33(1) |
| Ni(1) | 5000    | 9715(1)  | 2500    | 27(1) |
| N(1)  | 4417(1) | 10737(2) | 2625(3) | 25(1) |

**Table S2.** Atomic coordinates ( $\times 10^4$ ) and equivalent isotropic displacement parameters ( $\text{\AA}^2 \times 10^3$ ) for compound **NiMeOsalen**.  $U(\text{eq})$  is defined as one third of the trace of the orthogonalized  $U^{\text{ij}}$  tensor.

|      | x       | y       | z       | U(eq) |
|------|---------|---------|---------|-------|
| C(1) | 2755(1) | 2077(2) | 3857(1) | 13(1) |
| C(2) | 3172(1) | 1246(2) | 3191(1) | 12(1) |

|       |         |         |         |       |
|-------|---------|---------|---------|-------|
| C(3)  | 2667(1) | 315(2)  | 2348(1) | 15(1) |
| C(4)  | 1810(1) | 253(2)  | 2176(1) | 17(1) |
| C(5)  | 1404(1) | 1115(2) | 2832(1) | 16(1) |
| C(6)  | 1871(1) | 2016(2) | 3660(1) | 16(1) |
| C(7)  | 3217(1) | 2878(2) | 4782(1) | 13(1) |
| C(8)  | 4397(1) | 3762(2) | 6080(1) | 14(1) |
| C(9)  | 5255(1) | 2946(2) | 6475(1) | 15(1) |
| C(10) | 6393(1) | 2728(2) | 5714(1) | 14(1) |
| C(11) | 6816(1) | 2152(2) | 4977(1) | 13(1) |
| C(12) | 6378(1) | 1192(2) | 4110(1) | 12(1) |
| C(13) | 6872(1) | 319(2)  | 3537(1) | 14(1) |
| C(14) | 7727(1) | 520(2)  | 3770(1) | 16(1) |
| C(15) | 8146(1) | 1589(2) | 4594(1) | 17(1) |
| C(16) | 7698(1) | 2368(2) | 5201(1) | 15(1) |
| C(17) | 119(1)  | 1617(3) | 3282(1) | 24(1) |
| C(18) | 9443(1) | 2762(3) | 5576(1) | 27(1) |
| O(1)  | 3988(1) | 1262(1) | 3318(1) | 14(1) |
| O(2)  | 5563(1) | 1011(1) | 3824(1) | 13(1) |
| O(3)  | 547(1)  | 910(2)  | 2586(1) | 22(1) |
| O(4)  | 9000(1) | 1718(2) | 4737(1) | 23(1) |
| Ni(1) | 4790(1) | 1943(1) | 4462(1) | 11(1) |
| N(1)  | 4022(1) | 2890(2) | 5100(1) | 12(1) |
| N(2)  | 5597(1) | 2608(2) | 5603(1) | 13(1) |

**Table S3.** Atomic coordinates ( $\times 10^4$ ) and equivalent isotropic displacement parameters ( $\text{\AA}^2 \times 10^3$ ) for compound **NiMeOsalphen**.  $U(\text{eq})$  is defined as one third of the trace of the orthogonalized  $U^{ij}$  tensor.

|       | x        | y        | z       | U(eq) |
|-------|----------|----------|---------|-------|
| C(1)  | 76(1)    | 4798(2)  | 7015(1) | 16(1) |
| C(2)  | 1004(1)  | 4934(2)  | 6738(1) | 17(1) |
| C(3)  | 1830(1)  | 4052(2)  | 7183(1) | 19(1) |
| C(4)  | 1763(1)  | 3141(2)  | 7869(1) | 18(1) |
| C(5)  | 846(1)   | 3081(2)  | 8148(1) | 17(1) |
| C(6)  | 21(1)    | 3881(2)  | 7722(1) | 18(1) |
| C(7)  | -823(1)  | 5528(2)  | 6586(1) | 17(1) |
| C(8)  | -1839(1) | 7068(2)  | 5550(1) | 16(1) |
| C(9)  | -1787(1) | 8020(2)  | 4864(1) | 16(1) |
| C(10) | -647(1)  | 8997(2)  | 4054(1) | 17(1) |
| C(11) | 284(1)   | 9118(2)  | 3788(1) | 17(1) |
| C(12) | 1150(1)  | 8278(2)  | 4199(1) | 18(1) |
| C(13) | 2030(1)  | 8363(2)  | 3862(1) | 22(1) |
| C(14) | 2053(1)  | 9277(2)  | 3178(1) | 23(1) |
| C(15) | 1202(1)  | 10157(2) | 2784(1) | 20(1) |
| C(16) | 326(1)   | 10065(2) | 3079(1) | 18(1) |
| C(17) | 1548(1)  | 1381(2)  | 9284(1) | 25(1) |

|       |          |          |         |       |
|-------|----------|----------|---------|-------|
| C(18) | 476(1)   | 11666(2) | 1603(1) | 25(1) |
| C(19) | -2646(1) | 8796(2)  | 4443(1) | 21(1) |
| C(20) | -3545(1) | 8640(2)  | 4718(1) | 22(1) |
| C(21) | -3597(1) | 7684(2)  | 5402(1) | 21(1) |
| C(22) | -2748(1) | 6889(2)  | 5817(1) | 20(1) |
| N(1)  | -899(1)  | 6384(2)  | 5923(1) | 16(1) |
| N(2)  | -810(1)  | 8107(2)  | 4669(1) | 16(1) |
| Ni(1) | 146(1)   | 6909(1)  | 5385(1) | 15(1) |
| O(1)  | 1126(1)  | 5799(1)  | 6104(1) | 20(1) |
| O(2)  | 1187(1)  | 7417(2)  | 4863(1) | 20(1) |
| O(3)  | 708(1)   | 2235(2)  | 8830(1) | 23(1) |
| O(4)  | 1347(1)  | 11055(2) | 2115(1) | 27(1) |

**Table S4.** Atomic coordinates ( $\times 10^4$ ) and equivalent isotropic displacement parameters ( $\text{\AA}^2 \times 10^3$ ) for compound **Nisalphen**.  $U(\text{eq})$  is defined as one third of the trace of the orthogonalized  $U^{\text{ij}}$  tensor.

|        | x       | y        | z       | $U(\text{eq})$ |
|--------|---------|----------|---------|----------------|
| C(1A)  | 3747(2) | 5203(2)  | 6778(2) | 22(1)          |
| C(2A)  | 2879(2) | 4872(2)  | 5638(2) | 21(1)          |
| C(3A)  | 1866(2) | 5175(2)  | 5475(3) | 28(1)          |
| C(4A)  | 1726(2) | 5749(2)  | 6400(3) | 34(1)          |
| C(5A)  | 2575(3) | 6054(2)  | 7527(3) | 34(1)          |
| C(6A)  | 3571(2) | 5789(2)  | 7709(2) | 29(1)          |
| C(7A)  | 4814(2) | 4989(2)  | 7034(2) | 22(1)          |
| C(8A)  | 6197(2) | 4313(2)  | 6609(2) | 21(1)          |
| C(9A)  | 6353(2) | 3719(2)  | 5682(2) | 20(1)          |
| C(10A) | 5397(2) | 2821(2)  | 3629(2) | 22(1)          |
| C(11A) | 4498(2) | 2503(2)  | 2497(2) | 21(1)          |
| C(12A) | 3474(2) | 2787(2)  | 2296(2) | 22(1)          |
| C(13A) | 2670(2) | 2521(2)  | 1158(2) | 30(1)          |
| C(14A) | 2852(2) | 1957(2)  | 259(3)  | 36(1)          |
| C(15A) | 3840(2) | 1631(2)  | 451(3)  | 37(1)          |
| C(16A) | 4644(2) | 1906(2)  | 1548(2) | 29(1)          |
| C(19A) | 7383(2) | 3491(2)  | 5877(3) | 27(1)          |
| C(20A) | 8248(2) | 3859(2)  | 6999(3) | 31(1)          |
| C(21A) | 8098(2) | 4455(2)  | 7921(3) | 32(1)          |
| C(22A) | 7079(2) | 4683(2)  | 7735(2) | 28(1)          |
| O(1A)  | 2956(1) | 4313(1)  | 4724(2) | 22(1)          |
| O(2A)  | 3236(1) | 3285(1)  | 3110(2) | 23(1)          |
| N(1A)  | 5107(2) | 4478(2)  | 6271(2) | 19(1)          |
| N(2A)  | 5390(2) | 3405(2)  | 4582(2) | 19(1)          |
| Ni(1A) | 4184(1) | 3877(1)  | 4679(1) | 17(1)          |
| C(1B)  | 6324(2) | 9941(2)  | 7787(2) | 21(1)          |
| C(2B)  | 5288(2) | 10201(2) | 7600(2) | 21(1)          |

|        |         |          |         |       |
|--------|---------|----------|---------|-------|
| C(3B)  | 5226(2) | 10883(2) | 8586(2) | 27(1) |
| C(4B)  | 6121(2) | 11250(2) | 9681(2) | 33(1) |
| C(5B)  | 7131(2) | 10970(2) | 9866(2) | 34(1) |
| C(6B)  | 7222(2) | 10325(2) | 8930(2) | 27(1) |
| C(7B)  | 6483(2) | 9311(2)  | 6845(2) | 21(1) |
| C(8B)  | 5997(2) | 8342(2)  | 4880(2) | 19(1) |
| C(9B)  | 5125(2) | 8026(2)  | 3767(2) | 20(1) |
| C(10B) | 3229(2) | 8056(2)  | 2726(2) | 21(1) |
| C(11B) | 2225(2) | 8359(2)  | 2589(2) | 20(1) |
| C(12B) | 2101(2) | 8989(2)  | 3550(2) | 20(1) |
| C(13B) | 1116(2) | 9350(2)  | 3344(2) | 24(1) |
| C(14B) | 307(2)  | 9089(2)  | 2248(2) | 28(1) |
| C(15B) | 412(2)  | 8444(2)  | 1292(2) | 30(1) |
| C(16B) | 1356(2) | 8089(2)  | 1470(2) | 27(1) |
| C(19B) | 5277(2) | 7481(2)  | 2830(2) | 27(1) |
| C(20B) | 6295(2) | 7257(2)  | 3019(3) | 32(1) |
| C(21B) | 7161(2) | 7557(2)  | 4124(3) | 29(1) |
| C(22B) | 7017(2) | 8093(2)  | 5059(2) | 25(1) |
| O(1B)  | 4394(1) | 9845(1)  | 6573(2) | 22(1) |
| O(2B)  | 2861(1) | 9277(1)  | 4619(2) | 21(1) |
| N(1B)  | 5740(2) | 8933(2)  | 5757(2) | 17(1) |
| N(2B)  | 4137(2) | 8327(2)  | 3716(2) | 18(1) |
| Ni(1B) | 4287(1) | 9092(1)  | 5161(1) | 17(1) |
| C(31)  | 2217(3) | 4496(2)  | 8785(3) | 36(1) |
| Cl(31) | 1327(1) | 3195(1)  | 8175(1) | 76(1) |
| Cl(32) | 3624(1) | 4657(1)  | 9762(1) | 59(1) |
| Cl(33) | 1724(1) | 5526(1)  | 9483(1) | 64(1) |
| C(41)  | 723(2)  | 2487(2)  | 2488(2) | 25(1) |
| Cl(41) | 509(1)  | 1180(1)  | 1377(1) | 37(1) |
| Cl(42) | 214(1)  | 2317(1)  | 3321(1) | 35(1) |
| Cl(43) | 23(1)   | 3277(1)  | 1901(1) | 40(1) |
| C(51)  | 1942(2) | 9249(2)  | 6173(3) | 33(1) |
| Cl(51) | 2526(1) | 8847(1)  | 7221(1) | 57(1) |
| Cl(52) | 1730(1) | 10535(1) | 6754(1) | 69(1) |
| Cl(53) | 662(1)  | 8230(1)  | 4977(1) | 64(1) |

**Table S5.** Bond lengths [ $\text{\AA}$ ] and angles [ $^\circ$ ] for compound **Nisalphen**.

|             |          |              |          |
|-------------|----------|--------------|----------|
| C(1A)-C(2A) | 1.410(4) | C(5A)-H(5A)  | 0.9500   |
| C(1A)-C(6A) | 1.417(3) | C(6A)-H(6A)  | 0.9500   |
| C(1A)-C(7A) | 1.423(3) | C(7A)-N(1A)  | 1.308(3) |
| C(2A)-O(1A) | 1.306(3) | C(7A)-H(7A)  | 0.9500   |
| C(2A)-C(3A) | 1.421(3) | C(8A)-C(22A) | 1.390(4) |
| C(3A)-C(4A) | 1.374(4) | C(8A)-C(9A)  | 1.395(3) |
| C(3A)-H(3A) | 0.9500   | C(8A)-N(1A)  | 1.417(3) |
| C(4A)-C(5A) | 1.398(4) | C(9A)-C(19A) | 1.394(3) |
| C(4A)-H(4A) | 0.9500   | C(9A)-N(2A)  | 1.421(3) |
| C(5A)-C(6A) | 1.373(4) | C(10A)-N(2A) | 1.307(3) |



|               |            |                   |            |
|---------------|------------|-------------------|------------|
| C(10A)-C(11A) | 1.419(4)   | C(12B)-O(2B)      | 1.309(3)   |
| C(10A)-H(10A) | 0.9500     | C(12B)-C(13B)     | 1.418(3)   |
| C(11A)-C(16A) | 1.415(3)   | C(13B)-C(14B)     | 1.366(4)   |
| C(11A)-C(12A) | 1.417(3)   | C(13B)-H(13B)     | 0.9500     |
| C(12A)-O(2A)  | 1.312(3)   | C(14B)-C(15B)     | 1.403(4)   |
| C(12A)-C(13A) | 1.408(4)   | C(14B)-H(14B)     | 0.9500     |
| C(13A)-C(14A) | 1.377(4)   | C(15B)-C(16B)     | 1.366(4)   |
| C(13A)-H(13A) | 0.9500     | C(15B)-H(15B)     | 0.9500     |
| C(14A)-C(15A) | 1.399(4)   | C(16B)-H(16B)     | 0.9500     |
| C(14A)-H(14A) | 0.9500     | C(19B)-C(20B)     | 1.378(4)   |
| C(15A)-C(16A) | 1.360(4)   | C(19B)-H(19B)     | 0.9500     |
| C(15A)-H(15A) | 0.9500     | C(20B)-C(21B)     | 1.383(4)   |
| C(16A)-H(16A) | 0.9500     | C(20B)-H(20B)     | 0.9500     |
| C(19A)-C(20A) | 1.379(4)   | C(21B)-C(22B)     | 1.382(4)   |
| C(19A)-H(19A) | 0.9500     | C(21B)-H(21B)     | 0.9500     |
| C(20A)-C(21A) | 1.385(4)   | C(22B)-H(22B)     | 0.9500     |
| C(20A)-H(20A) | 0.9500     | O(1B)-Ni(1B)      | 1.8370(17) |
| C(21A)-C(22A) | 1.382(4)   | O(2B)-Ni(1B)      | 1.8360(16) |
| C(21A)-H(21A) | 0.9500     | N(1B)-Ni(1B)      | 1.8567(19) |
| C(22A)-H(22A) | 0.9500     | N(2B)-Ni(1B)      | 1.856(2)   |
| O(1A)-Ni(1A)  | 1.8398(16) | C(31)-Cl(31)      | 1.735(3)   |
| O(2A)-Ni(1A)  | 1.8346(18) | C(31)-Cl(32)      | 1.751(3)   |
| N(1A)-Ni(1A)  | 1.857(2)   | C(31)-Cl(33)      | 1.753(3)   |
| N(2A)-Ni(1A)  | 1.8564(19) | C(31)-H(31)       | 1.0000     |
| C(1B)-C(6B)   | 1.409(4)   | C(41)-Cl(42)      | 1.759(3)   |
| C(1B)-C(2B)   | 1.420(3)   | C(41)-Cl(43)      | 1.761(3)   |
| C(1B)-C(7B)   | 1.426(3)   | C(41)-Cl(41)      | 1.763(3)   |
| C(2B)-O(1B)   | 1.306(3)   | C(41)-H(41)       | 1.0000     |
| C(2B)-C(3B)   | 1.415(3)   | C(51)-Cl(52)      | 1.742(3)   |
| C(3B)-C(4B)   | 1.367(4)   | C(51)-Cl(53)      | 1.754(3)   |
| C(3B)-H(3B)   | 0.9500     | C(51)-Cl(51)      | 1.756(3)   |
| C(4B)-C(5B)   | 1.400(4)   | C(51)-H(51)       | 1.0000     |
| C(4B)-H(4B)   | 0.9500     |                   |            |
| C(5B)-C(6B)   | 1.367(4)   | C(2A)-C(1A)-C(6A) | 119.5(2)   |
| C(5B)-H(5B)   | 0.9500     | C(2A)-C(1A)-C(7A) | 122.1(2)   |
| C(6B)-H(6B)   | 0.9500     | C(6A)-C(1A)-C(7A) | 118.4(2)   |
| C(7B)-N(1B)   | 1.299(3)   | O(1A)-C(2A)-C(1A) | 123.8(2)   |
| C(7B)-H(7B)   | 0.9500     | O(1A)-C(2A)-C(3A) | 118.2(2)   |
| C(8B)-C(9B)   | 1.389(4)   | C(1A)-C(2A)-C(3A) | 118.0(2)   |
| C(8B)-C(22B)  | 1.396(3)   | C(4A)-C(3A)-C(2A) | 120.9(3)   |
| C(8B)-N(1B)   | 1.427(3)   | C(4A)-C(3A)-H(3A) | 119.5      |
| C(9B)-C(19B)  | 1.394(3)   | C(2A)-C(3A)-H(3A) | 119.5      |
| C(9B)-N(2B)   | 1.420(3)   | C(3A)-C(4A)-C(5A) | 121.1(3)   |
| C(10B)-N(2B)  | 1.307(3)   | C(3A)-C(4A)-H(4A) | 119.5      |
| C(10B)-C(11B) | 1.415(3)   | C(5A)-C(4A)-H(4A) | 119.5      |
| C(10B)-H(10B) | 0.9500     | C(6A)-C(5A)-C(4A) | 119.1(3)   |
| C(11B)-C(16B) | 1.411(4)   | C(6A)-C(5A)-H(5A) | 120.5      |
| C(11B)-C(12B) | 1.418(3)   | C(4A)-C(5A)-H(5A) | 120.5      |

|                      |            |                      |            |
|----------------------|------------|----------------------|------------|
| C(5A)-C(6A)-C(1A)    | 121.4(3)   | C(7A)-N(1A)-Ni(1A)   | 125.54(17) |
| C(5A)-C(6A)-H(6A)    | 119.3      | C(8A)-N(1A)-Ni(1A)   | 113.13(16) |
| C(1A)-C(6A)-H(6A)    | 119.3      | C(10A)-N(2A)-C(9A)   | 120.9(2)   |
| N(1A)-C(7A)-C(1A)    | 125.3(2)   | C(10A)-N(2A)-Ni(1A)  | 126.15(18) |
| N(1A)-C(7A)-H(7A)    | 117.4      | C(9A)-N(2A)-Ni(1A)   | 112.97(16) |
| C(1A)-C(7A)-H(7A)    | 117.4      | O(2A)-Ni(1A)-O(1A)   | 83.05(8)   |
| C(22A)-C(8A)-C(9A)   | 119.6(2)   | O(2A)-Ni(1A)-N(2A)   | 95.17(8)   |
| C(22A)-C(8A)-N(1A)   | 126.6(2)   | O(1A)-Ni(1A)-N(2A)   | 178.13(9)  |
| C(9A)-C(8A)-N(1A)    | 113.8(2)   | O(2A)-Ni(1A)-N(1A)   | 178.42(8)  |
| C(19A)-C(9A)-C(8A)   | 120.5(2)   | O(1A)-Ni(1A)-N(1A)   | 95.46(8)   |
| C(19A)-C(9A)-N(2A)   | 125.7(2)   | N(2A)-Ni(1A)-N(1A)   | 86.32(9)   |
| C(8A)-C(9A)-N(2A)    | 113.8(2)   | C(6B)-C(1B)-C(2B)    | 119.4(2)   |
| N(2A)-C(10A)-C(11A)  | 125.0(2)   | C(6B)-C(1B)-C(7B)    | 119.1(2)   |
| N(2A)-C(10A)-H(10A)  | 117.5      | C(2B)-C(1B)-C(7B)    | 121.5(2)   |
| C(11A)-C(10A)-H(10A) | 117.5      | O(1B)-C(2B)-C(3B)    | 118.5(2)   |
| C(16A)-C(11A)-C(12A) | 119.4(2)   | O(1B)-C(2B)-C(1B)    | 123.7(2)   |
| C(16A)-C(11A)-C(10A) | 118.7(2)   | C(3B)-C(2B)-C(1B)    | 117.8(2)   |
| C(12A)-C(11A)-C(10A) | 121.9(2)   | C(4B)-C(3B)-C(2B)    | 121.0(2)   |
| O(2A)-C(12A)-C(13A)  | 118.4(2)   | C(4B)-C(3B)-H(3B)    | 119.5      |
| O(2A)-C(12A)-C(11A)  | 123.7(2)   | C(2B)-C(3B)-H(3B)    | 119.5      |
| C(13A)-C(12A)-C(11A) | 118.0(2)   | C(3B)-C(4B)-C(5B)    | 121.2(3)   |
| C(14A)-C(13A)-C(12A) | 120.9(3)   | C(3B)-C(4B)-H(4B)    | 119.4      |
| C(14A)-C(13A)-H(13A) | 119.6      | C(5B)-C(4B)-H(4B)    | 119.4      |
| C(12A)-C(13A)-H(13A) | 119.6      | C(6B)-C(5B)-C(4B)    | 119.1(3)   |
| C(13A)-C(14A)-C(15A) | 121.0(3)   | C(6B)-C(5B)-H(5B)    | 120.5      |
| C(13A)-C(14A)-H(14A) | 119.5      | C(4B)-C(5B)-H(5B)    | 120.5      |
| C(15A)-C(14A)-H(14A) | 119.5      | C(5B)-C(6B)-C(1B)    | 121.5(2)   |
| C(16A)-C(15A)-C(14A) | 119.2(3)   | C(5B)-C(6B)-H(6B)    | 119.3      |
| C(16A)-C(15A)-H(15A) | 120.4      | C(1B)-C(6B)-H(6B)    | 119.3      |
| C(14A)-C(15A)-H(15A) | 120.4      | N(1B)-C(7B)-C(1B)    | 125.4(2)   |
| C(15A)-C(16A)-C(11A) | 121.4(2)   | N(1B)-C(7B)-H(7B)    | 117.3      |
| C(15A)-C(16A)-H(16A) | 119.3      | C(1B)-C(7B)-H(7B)    | 117.3      |
| C(11A)-C(16A)-H(16A) | 119.3      | C(9B)-C(8B)-C(22B)   | 120.0(2)   |
| C(20A)-C(19A)-C(9A)  | 119.2(3)   | C(9B)-C(8B)-N(1B)    | 113.8(2)   |
| C(20A)-C(19A)-H(19A) | 120.4      | C(22B)-C(8B)-N(1B)   | 126.1(2)   |
| C(9A)-C(19A)-H(19A)  | 120.4      | C(8B)-C(9B)-C(19B)   | 120.0(2)   |
| C(19A)-C(20A)-C(21A) | 120.3(2)   | C(8B)-C(9B)-N(2B)    | 113.8(2)   |
| C(19A)-C(20A)-H(20A) | 119.8      | C(19B)-C(9B)-N(2B)   | 126.2(2)   |
| C(21A)-C(20A)-H(20A) | 119.8      | N(2B)-C(10B)-C(11B)  | 125.4(2)   |
| C(22A)-C(21A)-C(20A) | 120.9(3)   | N(2B)-C(10B)-H(10B)  | 117.3      |
| C(22A)-C(21A)-H(21A) | 119.6      | C(11B)-C(10B)-H(10B) | 117.3      |
| C(20A)-C(21A)-H(21A) | 119.6      | C(16B)-C(11B)-C(10B) | 118.7(2)   |
| C(21A)-C(22A)-C(8A)  | 119.4(3)   | C(16B)-C(11B)-C(12B) | 119.1(2)   |
| C(21A)-C(22A)-H(22A) | 120.3      | C(10B)-C(11B)-C(12B) | 122.0(2)   |
| C(8A)-C(22A)-H(22A)  | 120.3      | O(2B)-C(12B)-C(13B)  | 118.3(2)   |
| C(2A)-O(1A)-Ni(1A)   | 127.71(16) | O(2B)-C(12B)-C(11B)  | 123.5(2)   |
| C(12A)-O(2A)-Ni(1A)  | 127.68(16) | C(13B)-C(12B)-C(11B) | 118.2(2)   |
| C(7A)-N(1A)-C(8A)    | 121.3(2)   | C(14B)-C(13B)-C(12B) | 120.7(2)   |

|                      |            |                     |            |
|----------------------|------------|---------------------|------------|
| C(14B)-C(13B)-H(13B) | 119.7      | C(10B)-N(2B)-C(9B)  | 121.2(2)   |
| C(12B)-C(13B)-H(13B) | 119.7      | C(10B)-N(2B)-Ni(1B) | 125.59(16) |
| C(13B)-C(14B)-C(15B) | 121.3(2)   | C(9B)-N(2B)-Ni(1B)  | 113.22(16) |
| C(13B)-C(14B)-H(14B) | 119.3      | O(2B)-Ni(1B)-O(1B)  | 83.03(7)   |
| C(15B)-C(14B)-H(14B) | 119.3      | O(2B)-Ni(1B)-N(2B)  | 95.47(8)   |
| C(16B)-C(15B)-C(14B) | 119.0(3)   | O(1B)-Ni(1B)-N(2B)  | 178.47(8)  |
| C(16B)-C(15B)-H(15B) | 120.5      | O(2B)-Ni(1B)-N(1B)  | 178.24(9)  |
| C(14B)-C(15B)-H(15B) | 120.5      | O(1B)-Ni(1B)-N(1B)  | 95.23(8)   |
| C(15B)-C(16B)-C(11B) | 121.7(2)   | N(2B)-Ni(1B)-N(1B)  | 86.27(9)   |
| C(15B)-C(16B)-H(16B) | 119.2      | Cl(31)-C(31)-Cl(32) | 111.15(16) |
| C(11B)-C(16B)-H(16B) | 119.2      | Cl(31)-C(31)-Cl(33) | 110.49(17) |
| C(20B)-C(19B)-C(9B)  | 119.5(3)   | Cl(32)-C(31)-Cl(33) | 110.13(17) |
| C(20B)-C(19B)-H(19B) | 120.3      | Cl(31)-C(31)-H(31)  | 108.3      |
| C(9B)-C(19B)-H(19B)  | 120.3      | Cl(32)-C(31)-H(31)  | 108.3      |
| C(19B)-C(20B)-C(21B) | 120.7(2)   | Cl(33)-C(31)-H(31)  | 108.3      |
| C(19B)-C(20B)-H(20B) | 119.6      | Cl(42)-C(41)-Cl(43) | 110.22(13) |
| C(21B)-C(20B)-H(20B) | 119.6      | Cl(42)-C(41)-Cl(41) | 109.42(14) |
| C(22B)-C(21B)-C(20B) | 120.3(2)   | Cl(43)-C(41)-Cl(41) | 110.78(15) |
| C(22B)-C(21B)-H(21B) | 119.8      | Cl(42)-C(41)-H(41)  | 108.8      |
| C(20B)-C(21B)-H(21B) | 119.8      | Cl(43)-C(41)-H(41)  | 108.8      |
| C(21B)-C(22B)-C(8B)  | 119.4(3)   | Cl(41)-C(41)-H(41)  | 108.8      |
| C(21B)-C(22B)-H(22B) | 120.3      | Cl(52)-C(51)-Cl(53) | 111.51(16) |
| C(8B)-C(22B)-H(22B)  | 120.3      | Cl(52)-C(51)-Cl(51) | 110.74(17) |
| C(2B)-O(1B)-Ni(1B)   | 127.75(15) | Cl(53)-C(51)-Cl(51) | 108.88(16) |
| C(12B)-O(2B)-Ni(1B)  | 127.63(15) | Cl(52)-C(51)-H(51)  | 108.5      |
| C(7B)-N(1B)-C(8B)    | 121.1(2)   | Cl(53)-C(51)-H(51)  | 108.5      |
| C(7B)-N(1B)-Ni(1B)   | 126.00(16) | Cl(51)-C(51)-H(51)  | 108.5      |
| C(8B)-N(1B)-Ni(1B)   | 112.87(16) |                     |            |

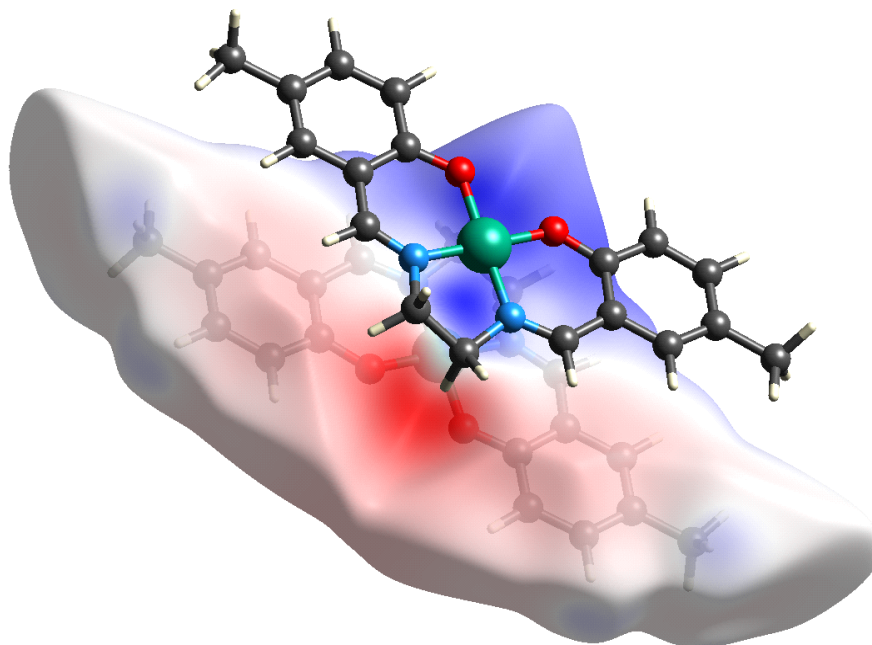

**Figure S1.** Normalized contact distance ( $d_{\text{norm}}$ , defined in terms of  $d_e$ ,  $d_i$ , and the van der Waals radii of the atoms) mapped on the Hirshfeld surface of the compound **NiMeOsalen**, represented together with one surrounding moiety to visualize the intermolecular interaction.

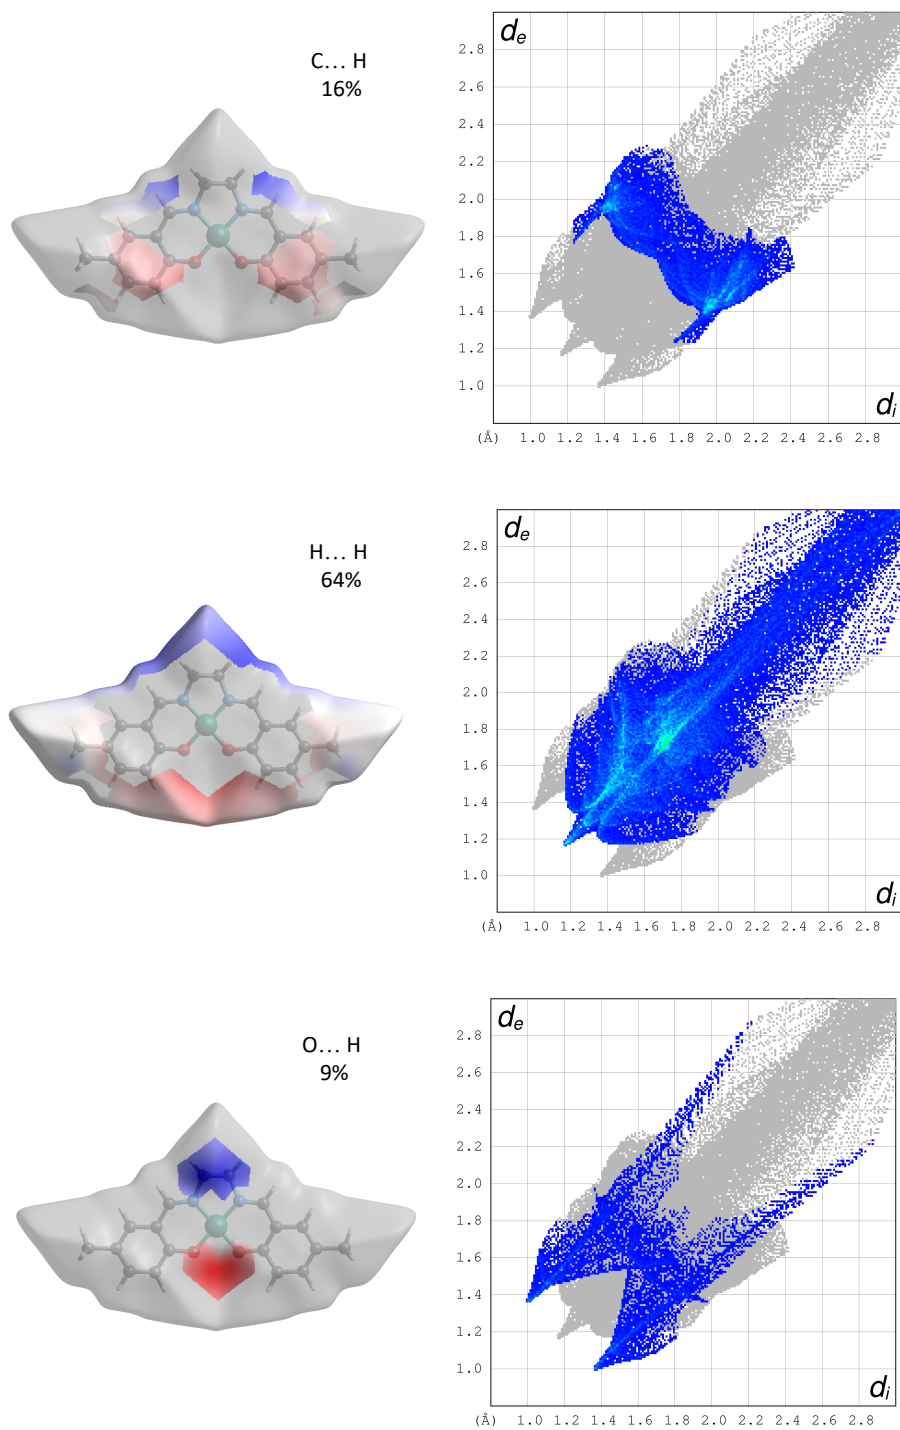

**Figure S2.** Hirshfeld surface with  $d_{\text{norm}}$  mapped and fingerprint plots for compound **NiMesalen**, with C...H interaction (first row) and H...H, O...H interactions (row 2–3). The color ranges from dark blue to red with increasing frequency (relative area of the surface) corresponding to each kind of interaction.

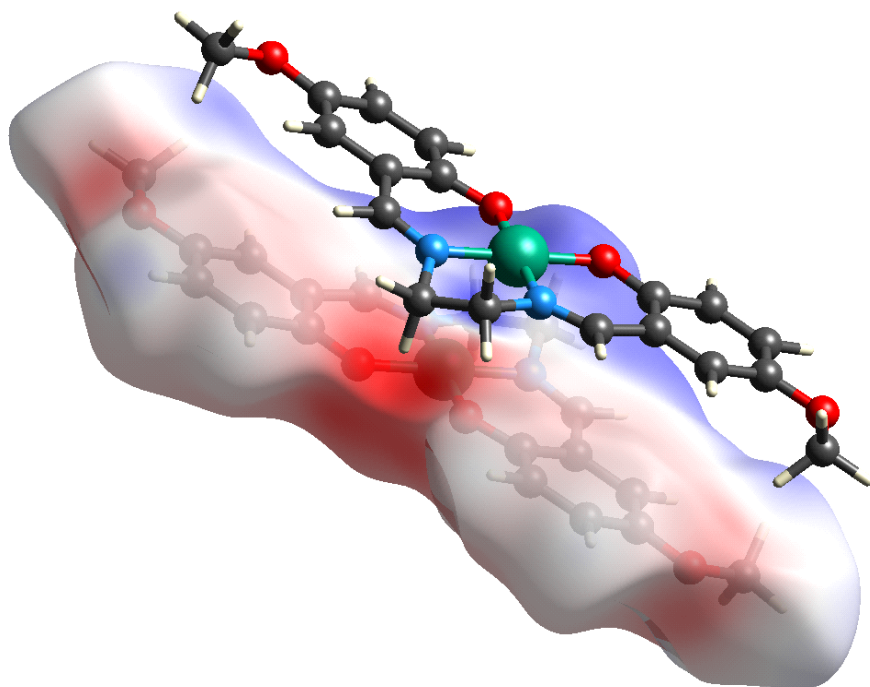

**Figure S3.** Normalized contact distance ( $d_{norm}$ , defined in terms of  $d_e$ ,  $d_i$ , and the van der Waals radii of the atoms) mapped on the Hirshfeld surface of the compound **NiMeOsalen**, represented together with one surrounding moiety to visualize the intermolecular interaction.

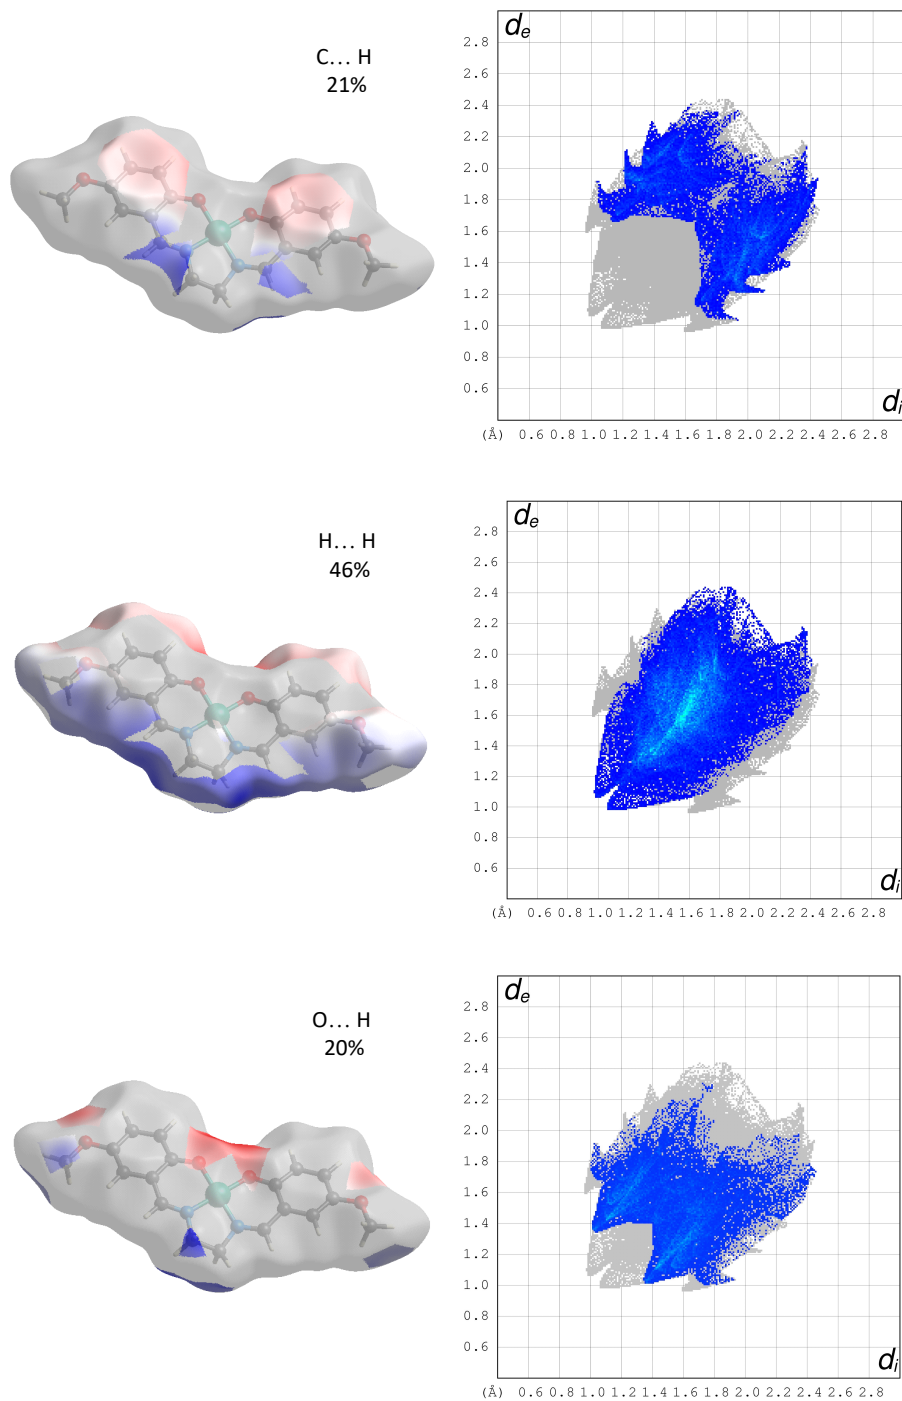

**Figure S4.** Hirshfeld surface with  $d_{\text{norm}}$  mapped and fingerprint plots for compound **NiMeOsalen**, with C...H interaction (first row) and H...H, O...H interactions (row 2–3). The color ranges from dark blue to red with increasing frequency (relative area of the surface) corresponding to each kind of interaction.

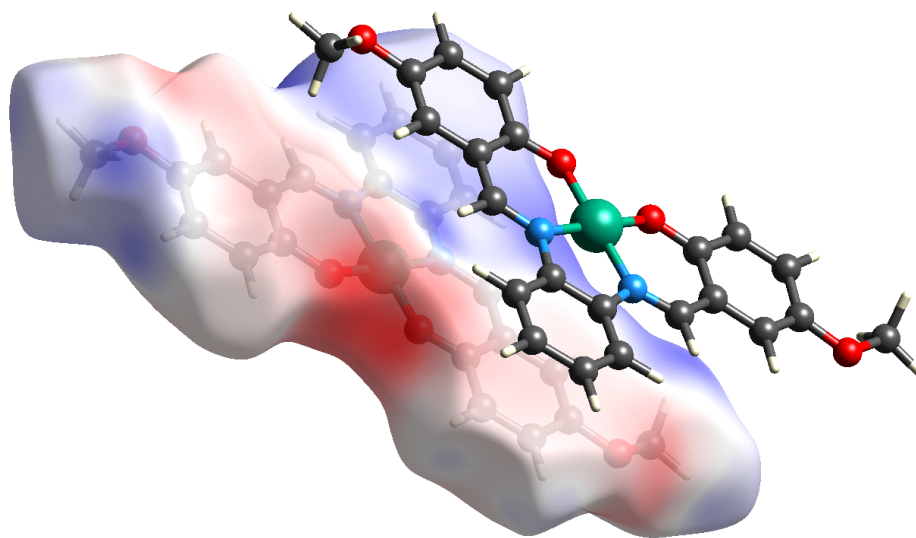

**Figure S5.** Normalized contact distance ( $d_{\text{norm}}$ , defined in terms of  $d_e$ ,  $d_i$ , and the van der Waals radii of the atoms) mapped on the Hirshfeld surface of the compound **NiMeOsalphen**, represented together with one surrounding moiety to visualize the intermolecular interaction.



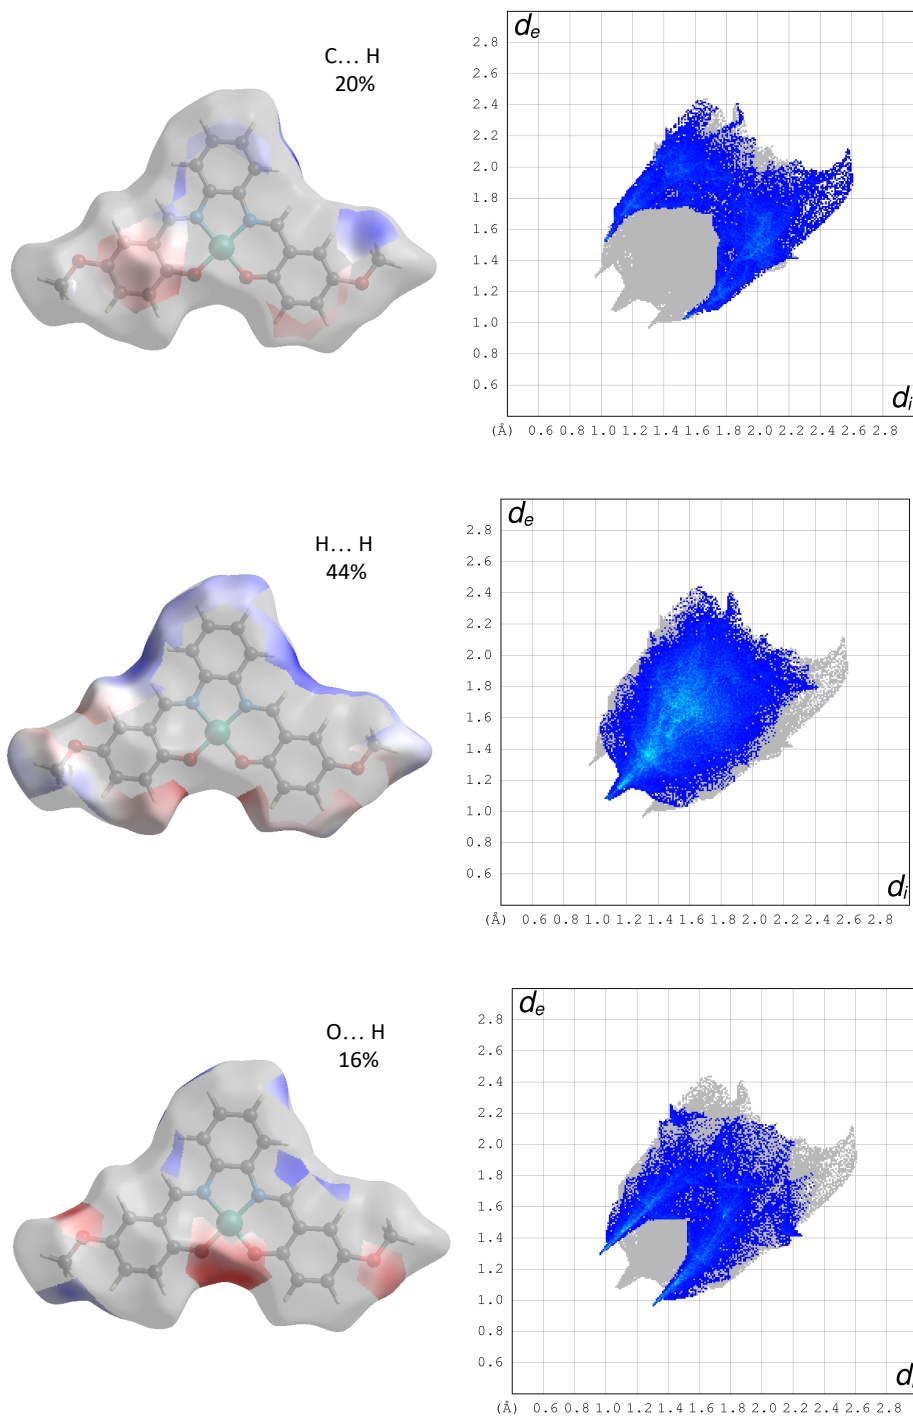

**Figure S6.** Hirshfeld surface with  $d_{\text{norm}}$  mapped and fingerprint plots for compound **NiMeOsalphen**, with C...H interaction (first row) and H...H, O...H interactions (row 2–3). The color ranges from dark blue to red with increasing frequency (relative area of the surface) corresponding to each kind of interaction.

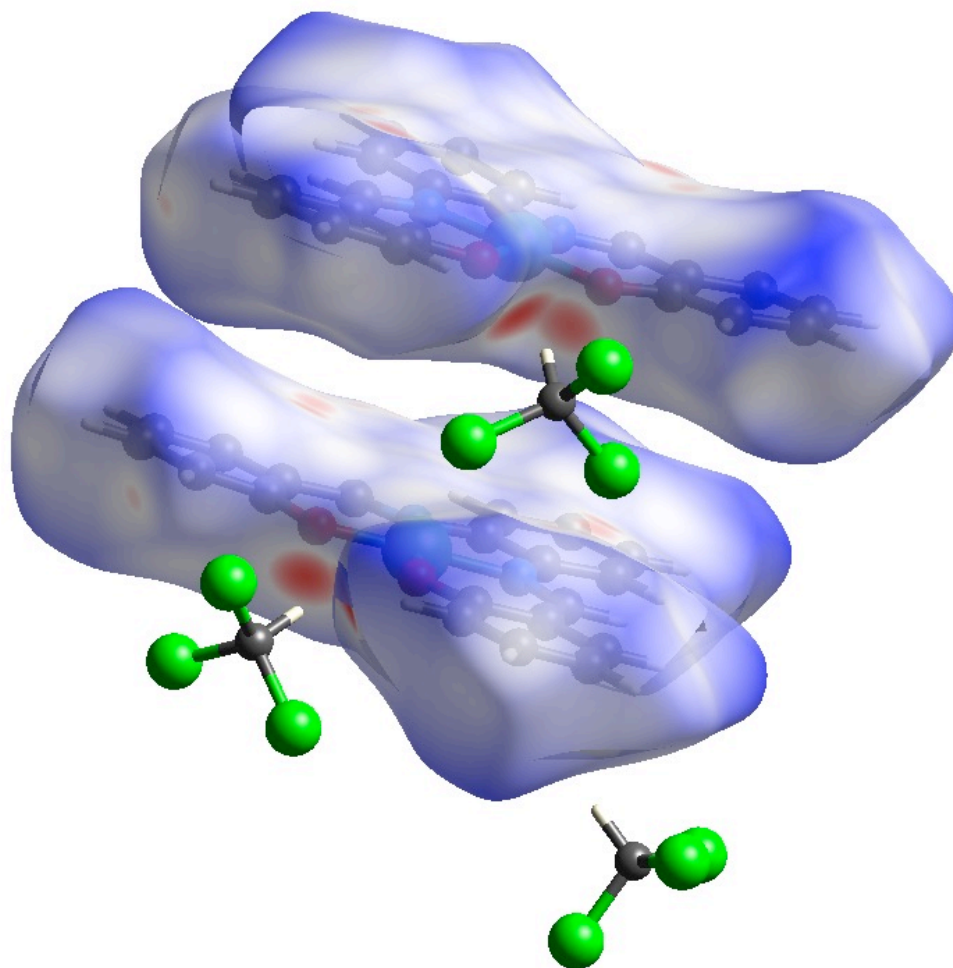

**Figure S7.** Normalized contact distance ( $d_{\text{norm}}$ , defined in terms of  $d_e$ ,  $d_i$ , and the van der Waals radii of the atoms) mapped on the Hirshfeld surface of the compound *Nisalphen*, represented together with one surrounding moiety to visualize the intermolecular interaction.

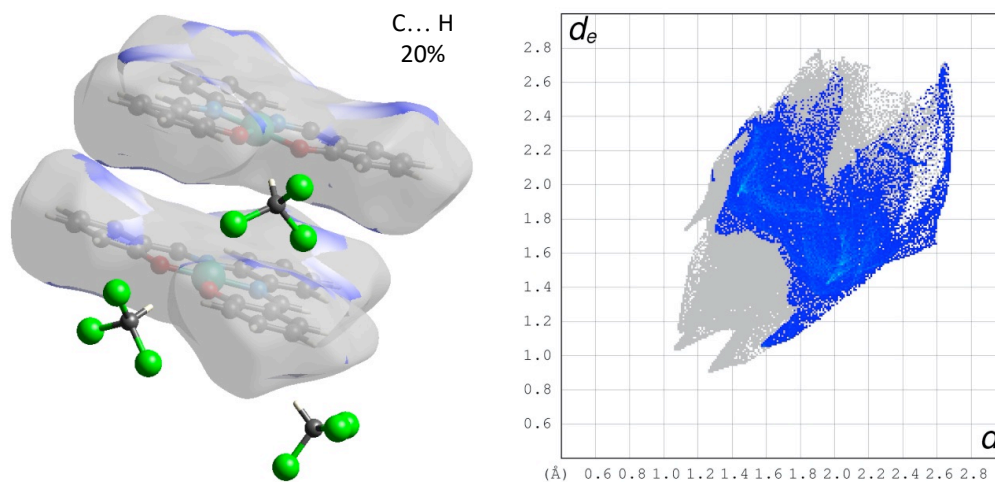

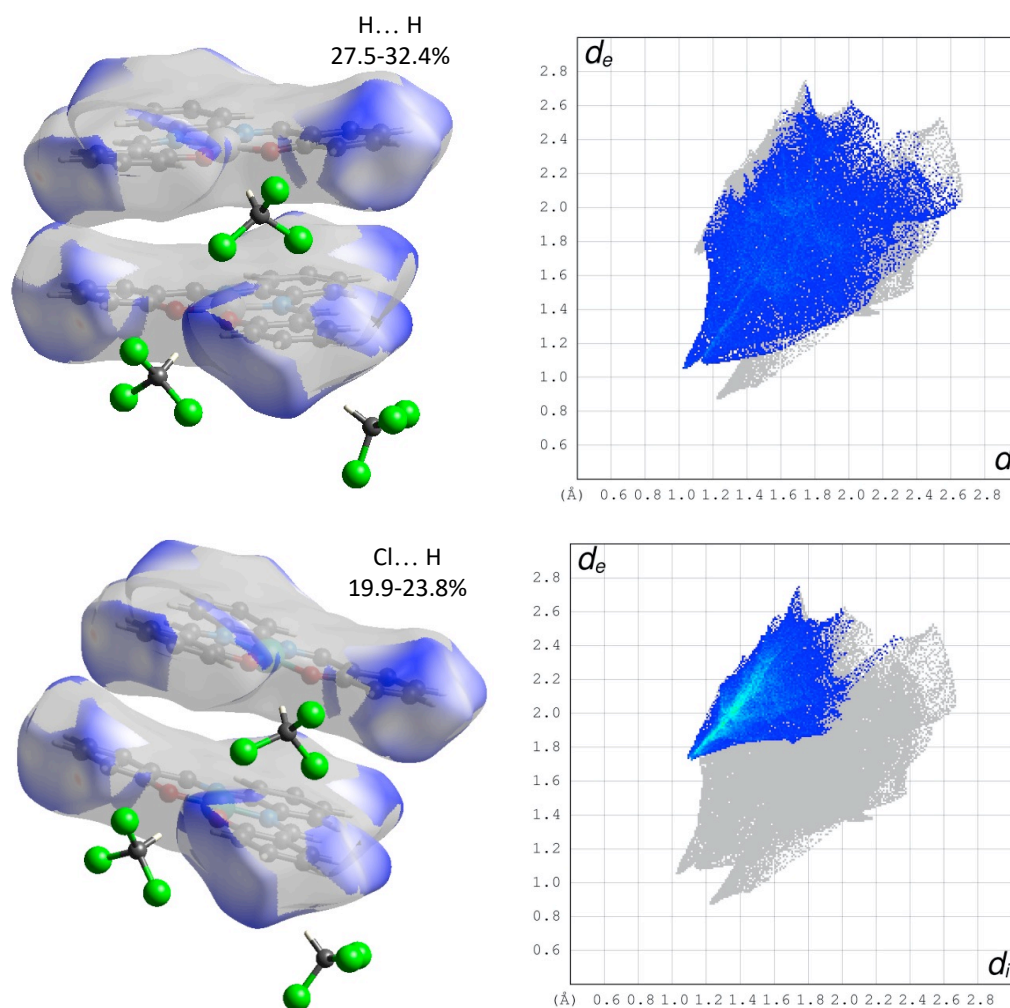

**Figure S8.** Hirshfeld surface with  $d_{\text{norm}}$  mapped and fingerprint plots of the two molecules name A and B in compound **Nisalphen** for  $\text{C}\cdots\text{H}$  interaction (first row) and  $\text{H}\cdots\text{H}$ ,  $\text{Cl}\cdots\text{H}$  interactions (row 2–3). The color ranges from dark blue to red with increasing frequency (relative area of the surface) corresponding to each kind of interaction.

**Table S6.** Effective magnetic moment, and number of unpaired electrons of Ni<sup>II</sup> complexes.

| Compound                | $\chi_m$ (cm <sup>3</sup> /mol) | $\chi_{corr}$ (cm <sup>3</sup> /mol) | $\mu_{eff}$ (MB) | # unpaired e <sup>-</sup> |
|-------------------------|---------------------------------|--------------------------------------|------------------|---------------------------|
| NiMeOsalen              | 5.03x10 <sup>-5</sup>           | 1.76 x10 <sup>-4</sup>               | 0.65             | 0                         |
| NiMesalen               | 6.05x10 <sup>-5</sup>           | 1.56 x10 <sup>-4</sup>               | 0.61             | 0                         |
| NiOHsalen               | 7.44x10 <sup>-5</sup>           | 1.28 x10 <sup>-4</sup>               | 0.55             | 0                         |
| Nisalen                 | 1.23x10 <sup>-4</sup>           | 6.51x10 <sup>-5</sup>                | 0.39             | 0                         |
| NiClsalen               | 1.05 x10 <sup>-4</sup>          | 1.22 x10 <sup>-4</sup>               | 0.54             | 0                         |
| NiBrsalen               | 1.76 x10 <sup>-4</sup>          | 7.24x10 <sup>-5</sup>                | 0.41             | 0                         |
| NiNO <sub>2</sub> salen | 1.88 x10 <sup>-4</sup>          | 3.22 x10 <sup>-4</sup>               | 0.27             | 0                         |
| NiMeOsalphen            | 1.79x10 <sup>-5</sup>           | 3.61x10 <sup>-3</sup>                | 0.17             | 0                         |
| NiMesalphen             | 2.22x10 <sup>-5</sup>           | 4.88 x10 <sup>-3</sup>               | 0.20             | 0                         |
| NiOHsalphen             | -5.44x10 <sup>-5</sup>          | 1.46x10 <sup>-2</sup>                | 0.34             | 0                         |
| Nisalphen               | -1.09 x10 <sup>-4</sup>         | 3.16x10 <sup>-2</sup>                | 0.51             | 0                         |
| NiClsalphen             | -1.47 x10 <sup>-4</sup>         | 4.68x10 <sup>-2</sup>                | 0.61             | 0                         |
| NiBrsalphen             | 2.78 x10 <sup>-4</sup>          | 8.69x10 <sup>-2</sup>                | 0.84             | 0                         |

**Table S7.** <sup>1</sup>H-NMR values for the ligands and nickel complexes.

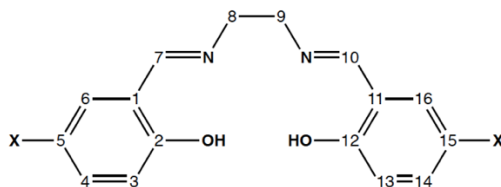

|           | Key                          | Solvent      | $\delta_{OH}$ | $\delta_{7,10}$ | $\delta_{Aromatic}$ | $\delta_{8,9}$ | $\delta_A$ (ppm) |
|-----------|------------------------------|--------------|---------------|-----------------|---------------------|----------------|------------------|
|           |                              |              | (ppm)         | (ppm)           | (ppm)               | (ppm)          |                  |
| Ligands   | <b>MeOsalen</b>              | Chloroform   | 12.63 (s)     | 8.30 (s)        | 6.73-6.89           | 3.94 (s)       | 3.74 (s)         |
|           | <b>Mesalen</b>               | Chloroform   | 12.95 (s)     | 8.29 (s)        | 6.84-7.08           | 3.92 (s)       | 2.26 (s)         |
|           | <b>OHsalen</b>               | Acetone-d6   | 12.40 (s)     | 8.46 (s)        | 6.66-6.73           | 3.35 (s)       | 12.40 (s)        |
|           | <b>Salen</b>                 | Chloroform   | 13.19 (s)     | 8.36 (s)        | 6.88-7.29           | 3.43 (s)       | ---              |
|           | <b>Clsalen</b>               | Chloroform   | 13.08 (s)     | 8.29 (s)        | 6.90-7.24           | 3.95 (s)       | ---              |
|           | <b>Brsalen</b>               | Chloroform   | 13.10 (s)     | 8.28 (s)        | 6.84- 7.34          | 3.95 (s)       | ---              |
|           | <b>NO<sub>2</sub>salen</b>   | DMSO-d6      | ---           | 8.77 (s)        | 6.79-7.40           | 4.01 (s)       | ---              |
|           | <b>MeOsalphen</b>            | Acetone-d6   | 12.46 (s)     | 8.85 (s)        | 6.88-7.44           | ---            | 3.78 (s)         |
|           | <b>Mesalphen</b>             | Acetonitrile | 12.86 (s)     | 8.70 (s)        | 6.88-7.41           | ---            | 2.37 (d)         |
|           | <b>OHsalphen</b>             | Acetone-d6   | 12.30 (s)     | 8.76 (s)        | 6.94-7.41           | ---            | 12.32(s)         |
|           | <b>Brsalphen</b>             | Acetone-d6   | 13.09 (s)     | 8.91 (s)        | 6.95-7.78           | ---            | ---              |
| Complexes | <b>NiMeOsalen</b>            | DMSO-d6      | ---           | 7.80 (s)        | 6.62-6.85           | 3.62 (s)       | 3.33 (s)         |
|           | <b>NiMesalen</b>             | Chloroform   | ---           | 7.25 (s)        | 6.64-6.94           | 3.38 (s)       | 2.58 (s)         |
|           | <b>NiOHsalen</b>             | DMSO-d6      | 7.75 (s)      | 7.75 (s)        | 6.53-6.71           | 3.35 (s)       | 8.52 (s)         |
|           | <b>Nisalen</b>               | Chloroform   | ---           | 7.38 (s)        | 6.99-7.27           | 3.43 (s)       | ---              |
|           | <b>NiClsalen</b>             | Chloroform   | ---           | 7.44 (s)        | 6.95-7.13           | 3.47 (s)       | ---              |
|           | <b>NiBrsalen</b>             | Chloroform   | ---           | 7.45 (s)        | 6.91-7.26           | 3.46 (s)       | ---              |
|           | <b>NiNO<sub>2</sub>salen</b> | DMSO-d6      | ---           | 7.95 (s)        | ---                 | 3.53 (s)       | ---              |
|           | <b>NiMeOsalphen</b>          | Chloroform   | ---           | 8.23(s)         | 6.69-7.14           | ---            | 3.78 (s)         |
|           | <b>NiOHsalphen</b>           | DMF-d7       | ---           | 8.00 (s)        | 6.79-7.28           | ---            | 8.97(s)          |

**Table S8.**  $^{13}\text{C}$ -NMR values for the ligands and nickel complexes.

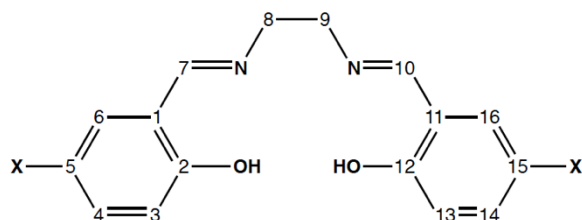

|           | Key               | Solvent                | (ppm) |
|-----------|-------------------|------------------------|-------|-------|-------|-------|-------|-------|-------|-------|
| Ligands   | <b>MeOsalen</b>   | Chloroform             | 118   | 151   | 155   | 119   | 117   | 118   | 166   | 60    |
|           | <b>Mesalen</b>    | Chloroform             | 130   | 133   | 159   | 132   | 128   | 118   | 166   | 60    |
|           | <b>Salen</b>      | Chloroform             | 116   | 132   | 161   | 131   | 118   | 118   | 166   | 60    |
|           | <b>Clsalen</b>    | Chloroform             | 118   | 132   | 159   | 130   | 123   | 119   | 165   | 59    |
|           | <b>Brsalen</b>    | Chloroform             | 110   | 135   | 160   | 133   | 120   | 119   | 165   | 59    |
|           | <b>MeOsalphen</b> | Acetone-d <sub>6</sub> | 115   | 119   | 155   | 117   | 118   | 152   | 166   | 143   |
|           | <b>Mesalphen</b>  | Acetonitrile           | 133   | 120   | 159   | 118   | 135   | 128   | 165   | 143   |
|           | <b>Brsalphen</b>  | Acetone-d <sub>6</sub> | 135   | 121   | 160   | 119   | 136   | 110   | 164   | 142   |
|           | <b>OHsalphen</b>  | DMF-d <sub>7</sub>     | 117   | 117   | 155   | 119   | 121   | 150   | 165   | 143   |
| Complexes | <b>NiMeOsalen</b> | DMSO-d <sub>6</sub>    | 113   | 120   | 162   | 119   | 124   | 149   | 160   | 55    |
|           | <b>NiMesalen</b>  | Chloroform             | 123   | 121   | 163   | 119   | 135   | 131   | 161   | 58    |
|           | <b>NiOHsalen</b>  | DMSO-d <sub>6</sub>    | 115   | 119   | 162   | 120   | 124   | 146   | 159   | 55    |
|           | <b>Nisalen</b>    | Chloroform             | 134   | 121   | 165   | 131   | 121   | 115   | 162   | 58    |

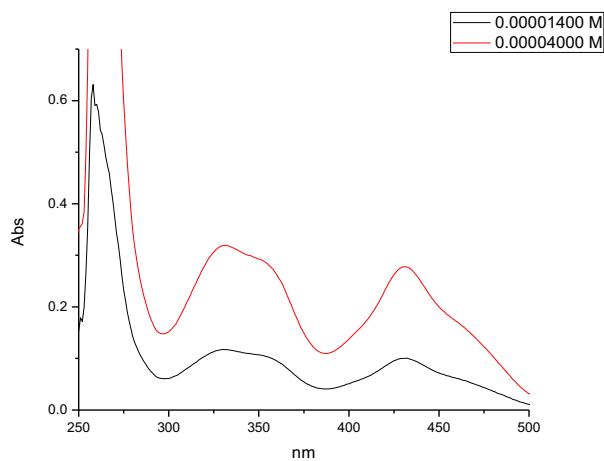

**Figure S9.** UV-vis of NiMeOsalen in DMSO solution

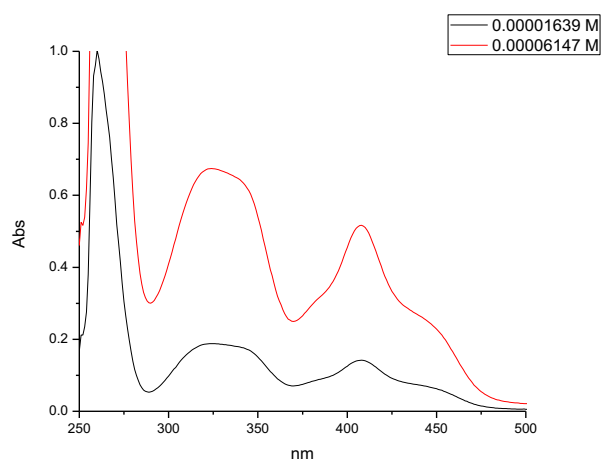

**Figure S12.** UV-vis of Nisalen in DMSO solution

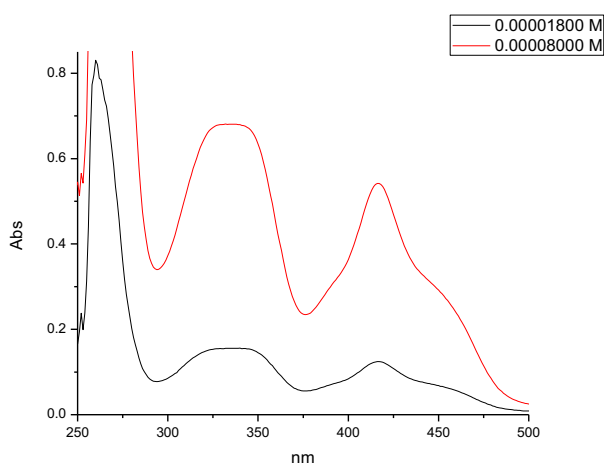

**Figure S10.** UV-vis NiMesalen in DMSO solution

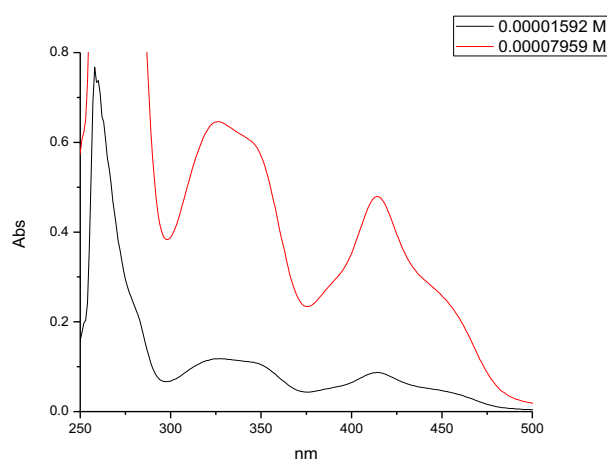

**Figure S13.** UV-vis of NiClsalen in DMSO solution

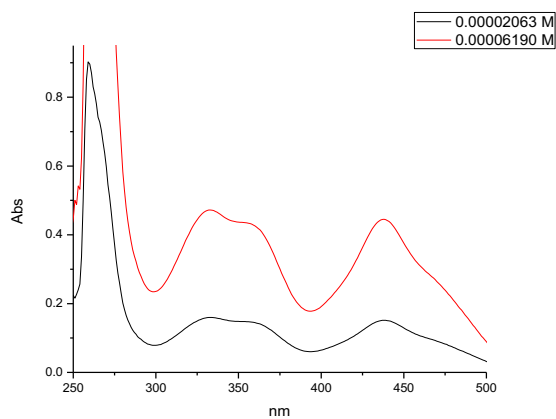

**Figure S11.** UV-vis NiOHsalen in DMSO solution

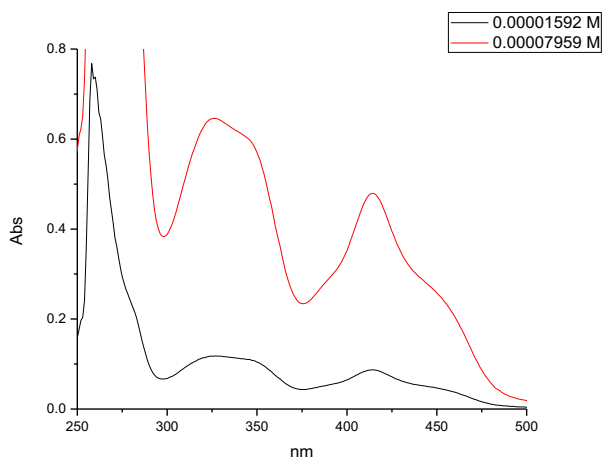

**Figure S14.** UV-vis of NiBrsalen in DMSO solution

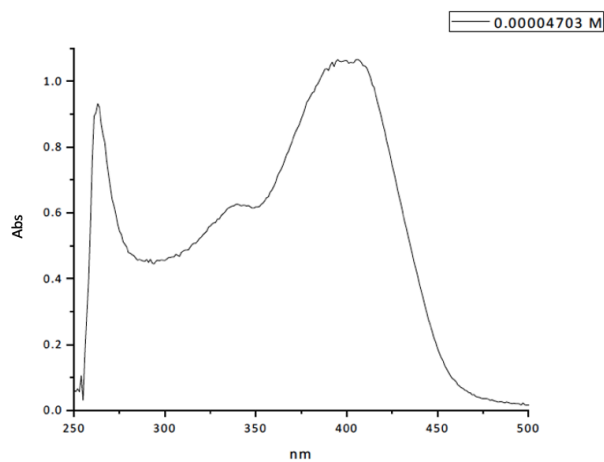

**Figure S15.** UV-vis  $\text{NiNO}_2\text{salen}$  in DMSO solution

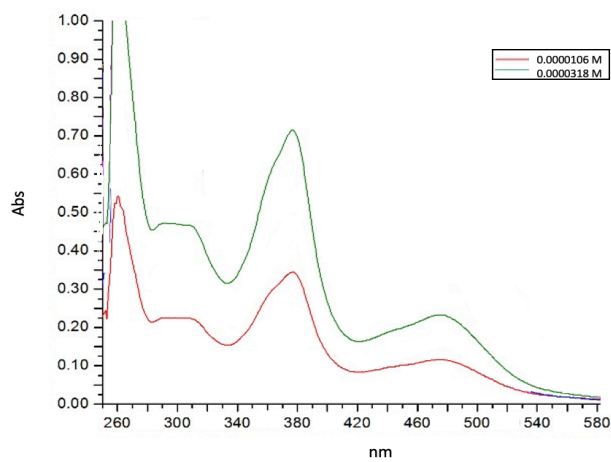

**Figure S18.** UV-vis Nisalphen in DMSO solution

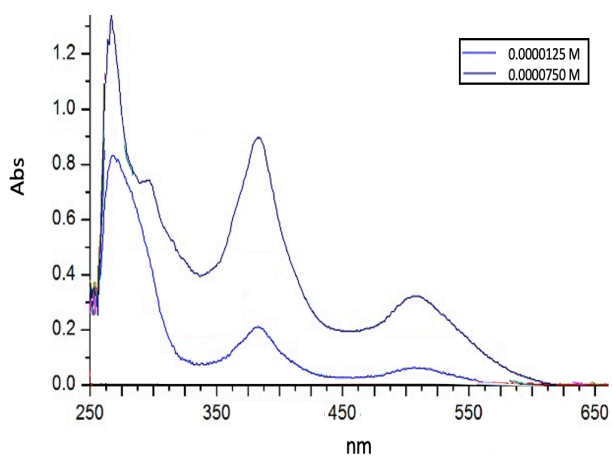

**Figure S16.** UV-vis  $\text{NiMeOsalphen}$  in DMSO solution

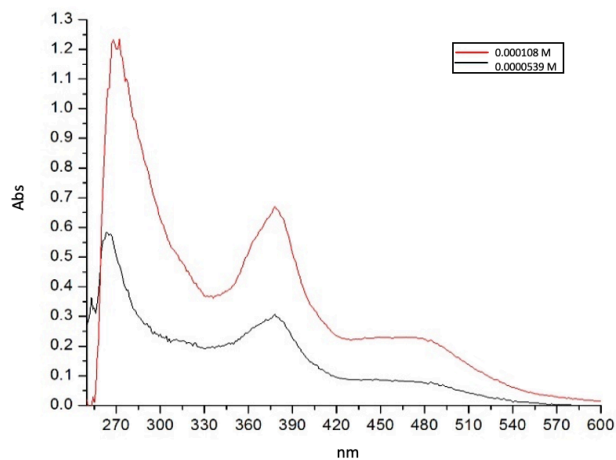

**Figure S19.** UV-vis  $\text{NiClisalphen}$  in DMSO solution

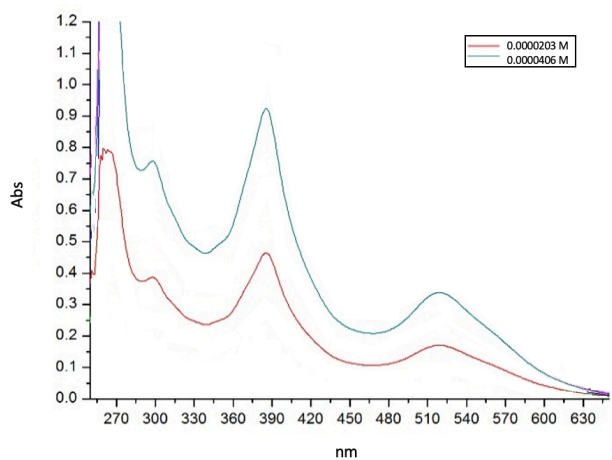

**Figure S17.** UV-vis  $\text{NiOHsalphen}$  in DMSO solution

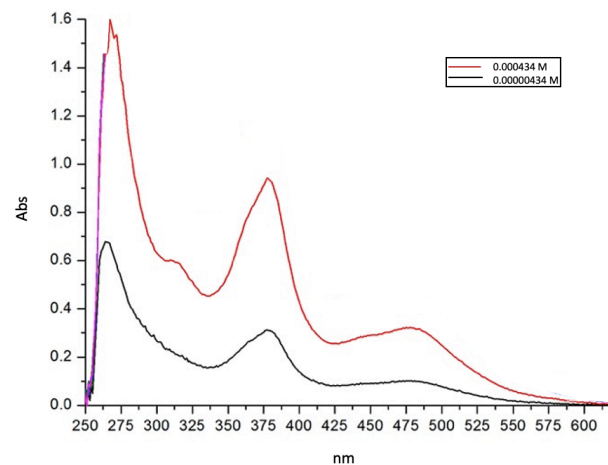

**Figure S20.** UV-vis  $\text{NiBrsalphen}$  in DMSO solution



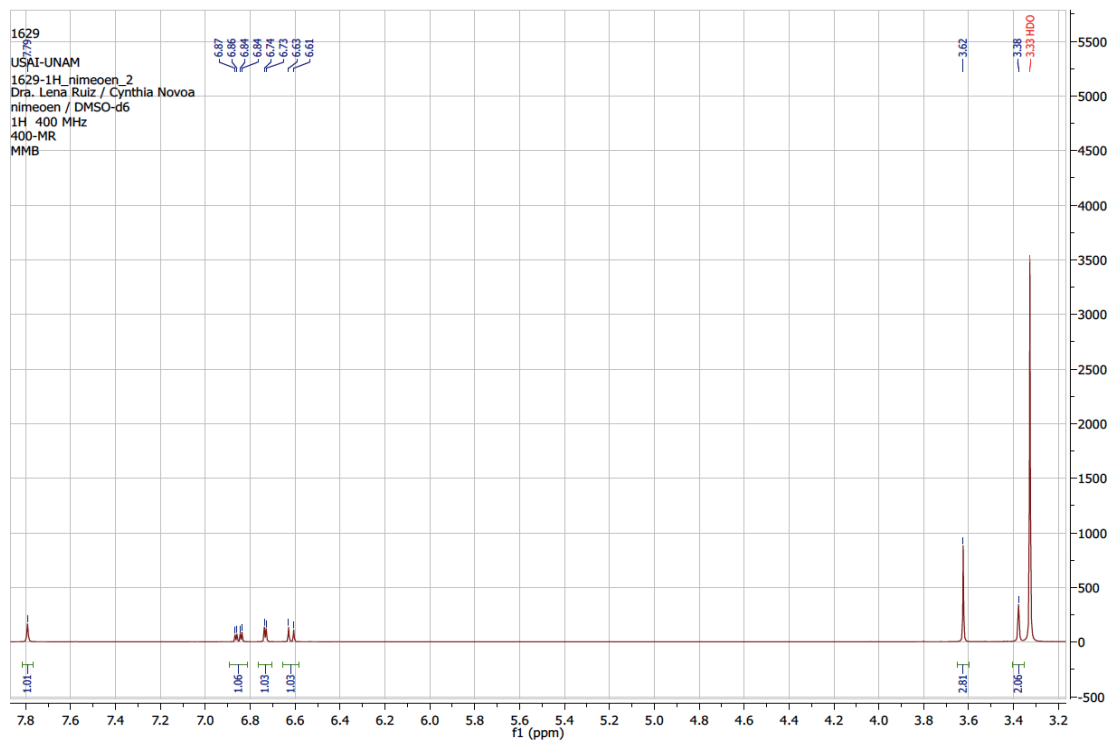

**Figure S21.**  $^1\text{H}$ -NMR of NiMeOsalen in DMSO-d<sub>6</sub>.

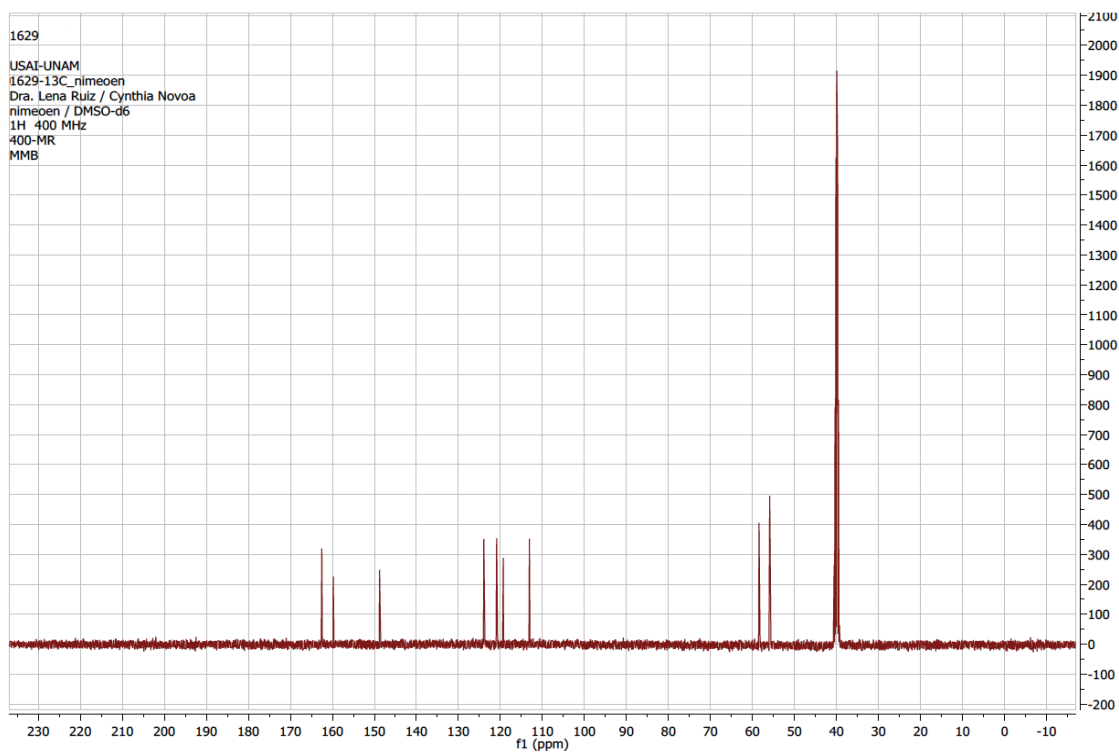

**Figure S22.**  $^{13}\text{C}$ -NMR of NiMeOsalen in DMSO-d<sub>6</sub>.

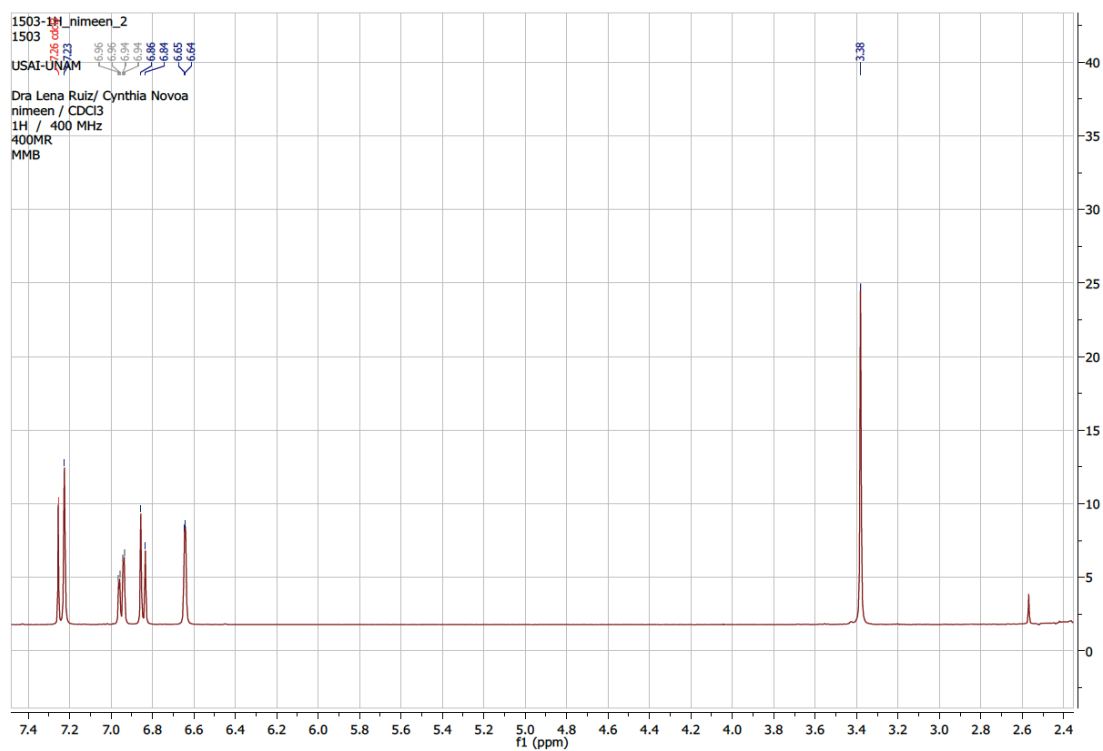

Figure S23. <sup>1</sup>H-NMR of NiMesalen in chloroform.

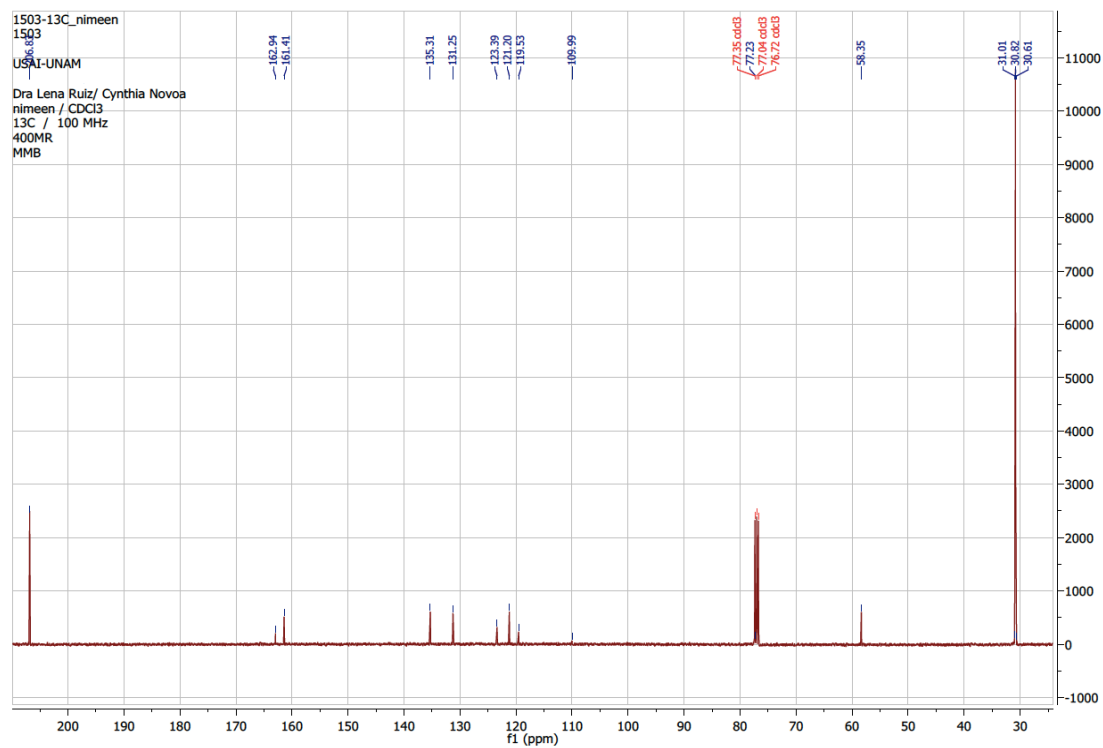

Figure S24. <sup>13</sup>C-NMR of NiMesalen in chloroform.

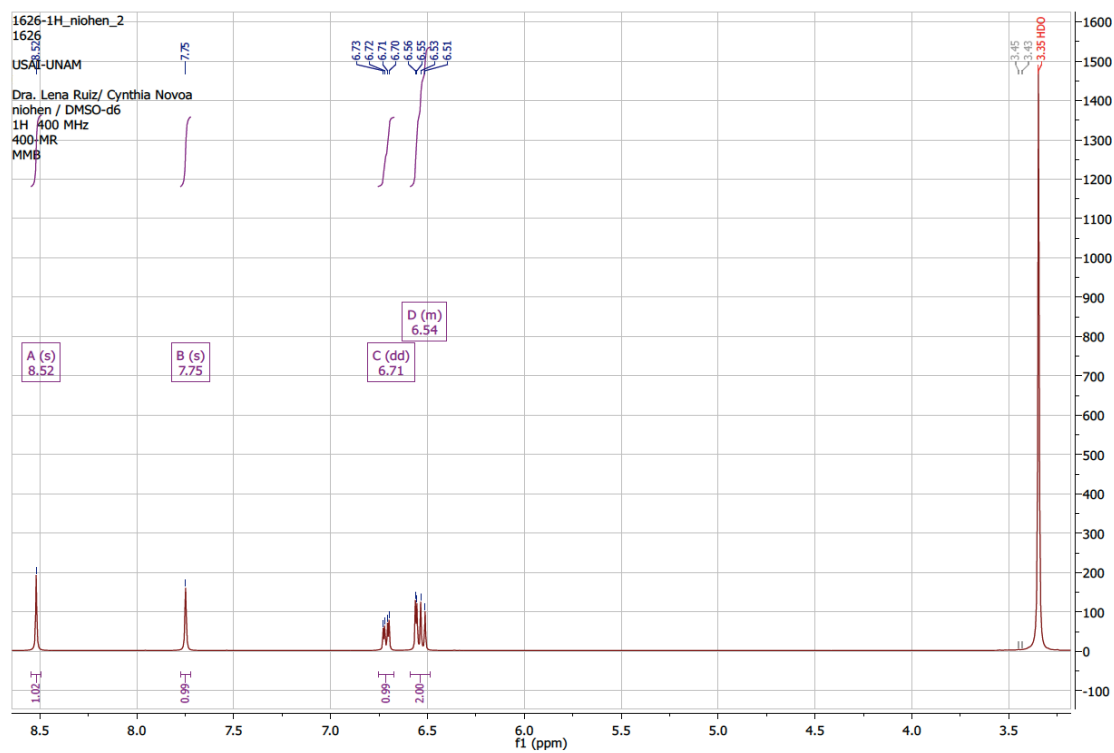

Figure S25.  $^1\text{H}$ -NMR of NiOHsalen in DMSO-d<sub>6</sub>.

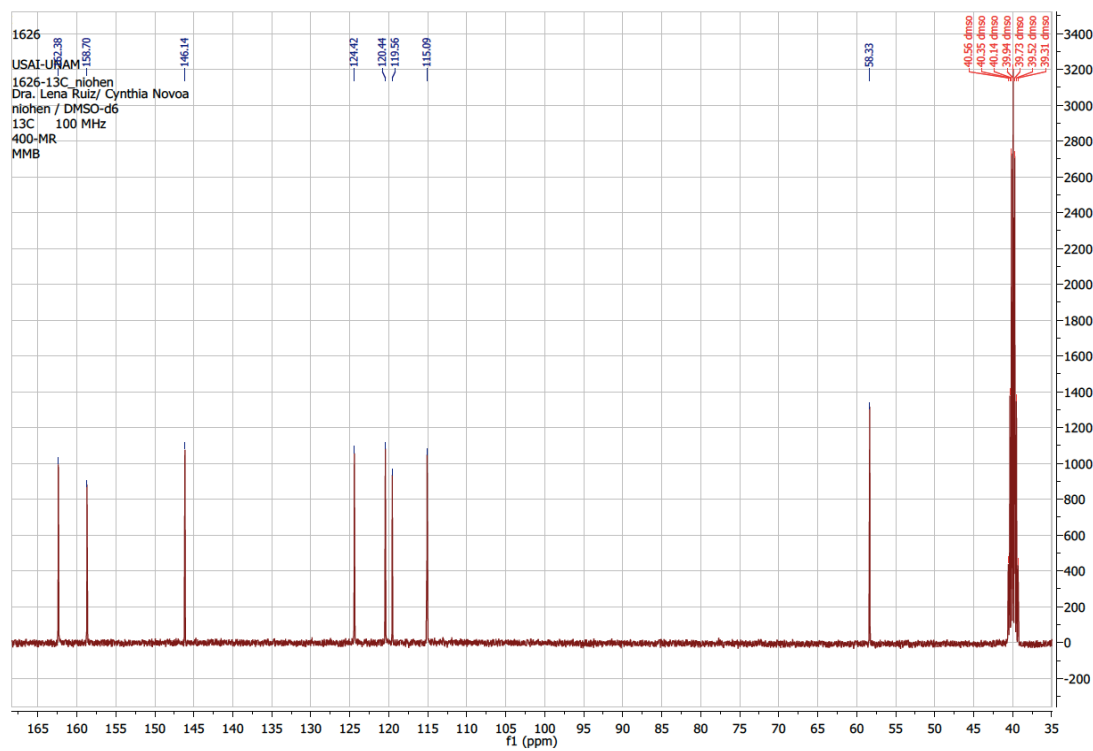

Figure S26.  $^{13}\text{C}$ -NMR of NiOHsalen in DMSO-d<sub>6</sub>.

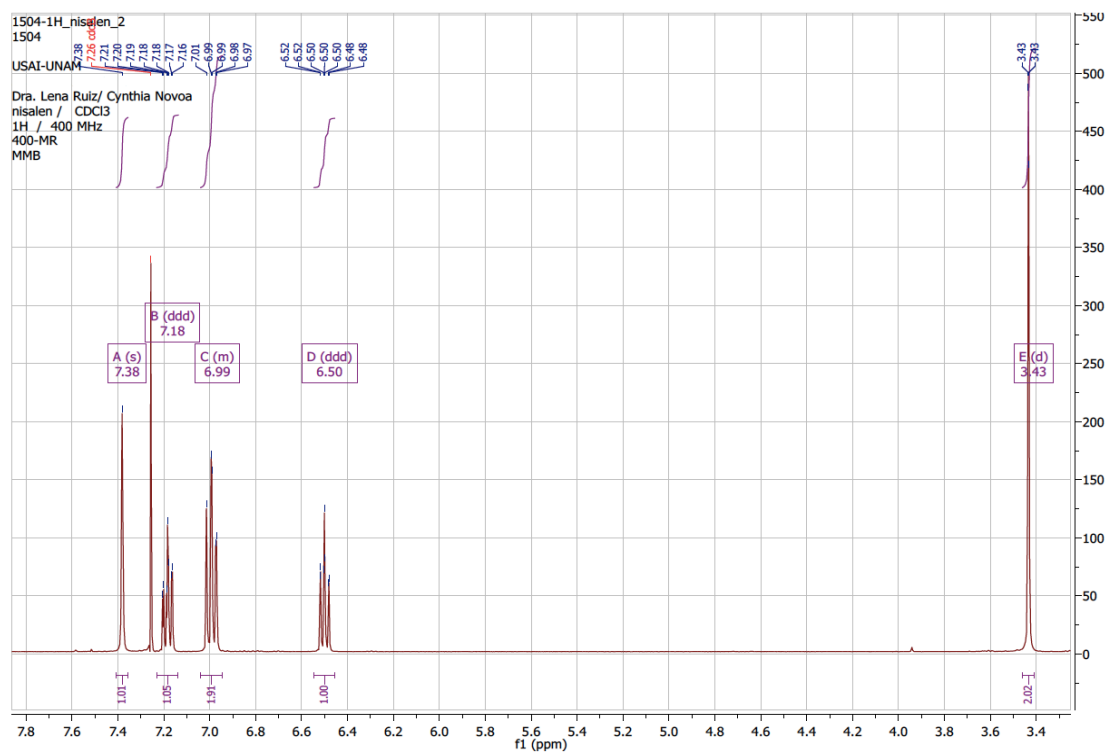

Figure S27.  $^1\text{H}$ -NMR of Nisalen in chloroform.

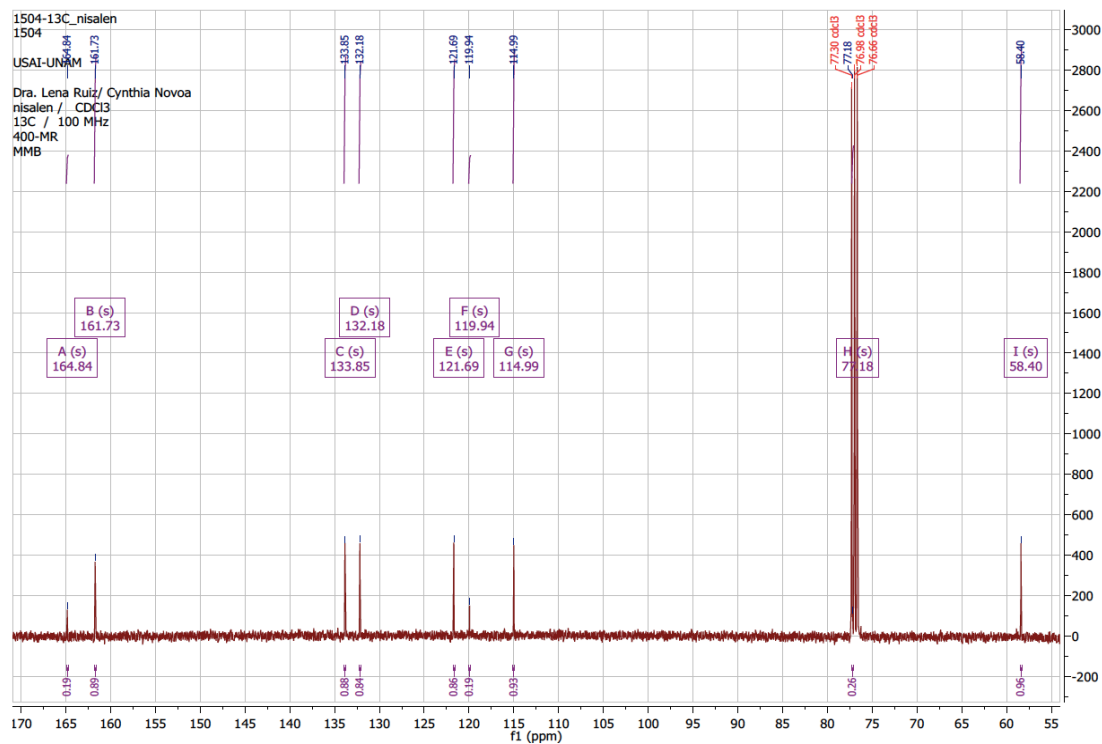

Figure S28.  $^{13}\text{C}$ -NMR of Nisalen in chloroform.

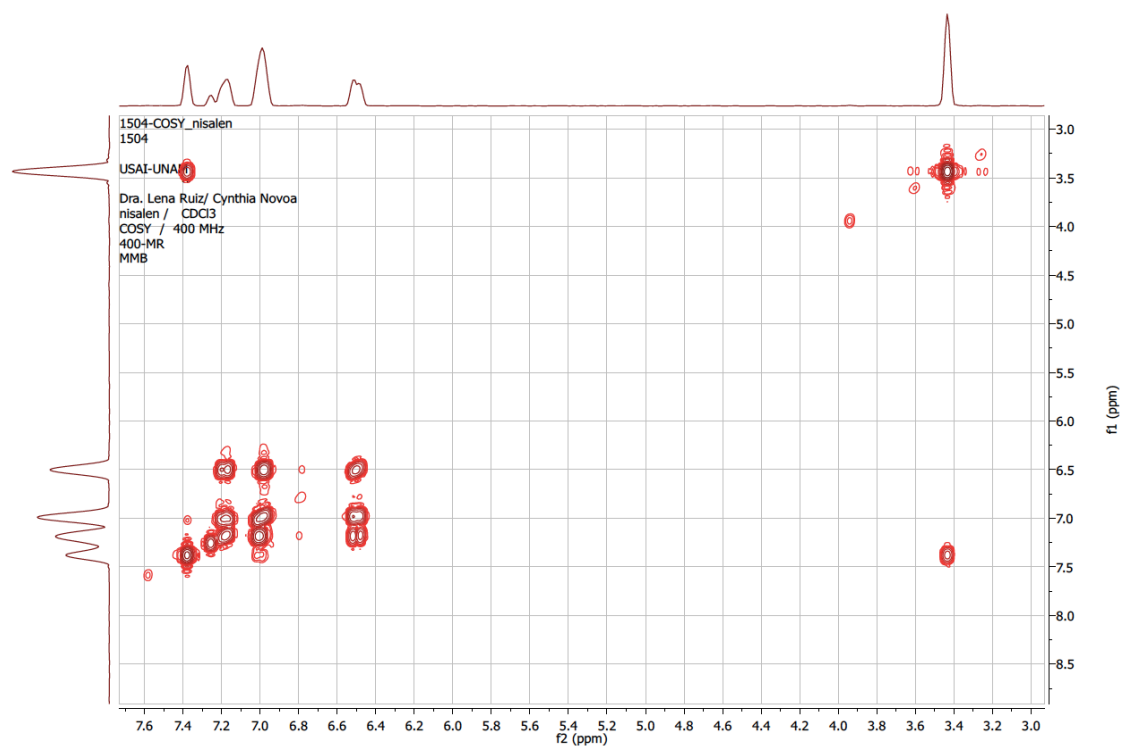

**Figure S29.** COSY spectrum of Nisalen in chloroform.

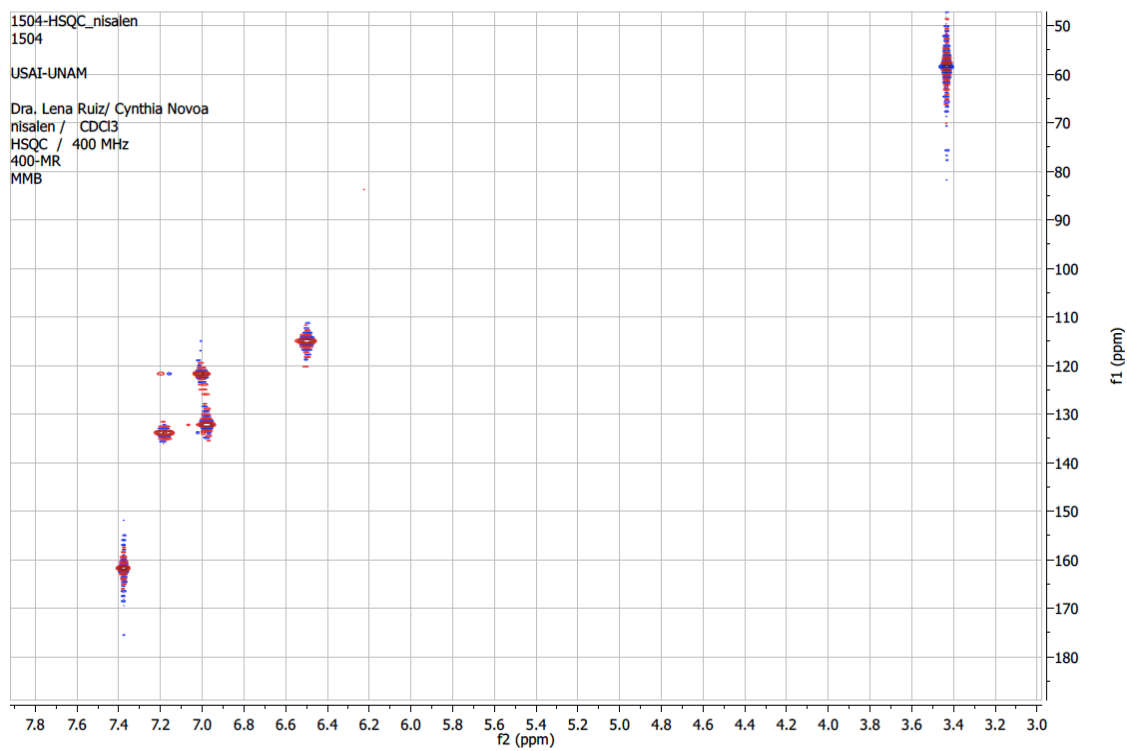

**Figure S30.** HSQC spectrum of Nisalen in choloform.

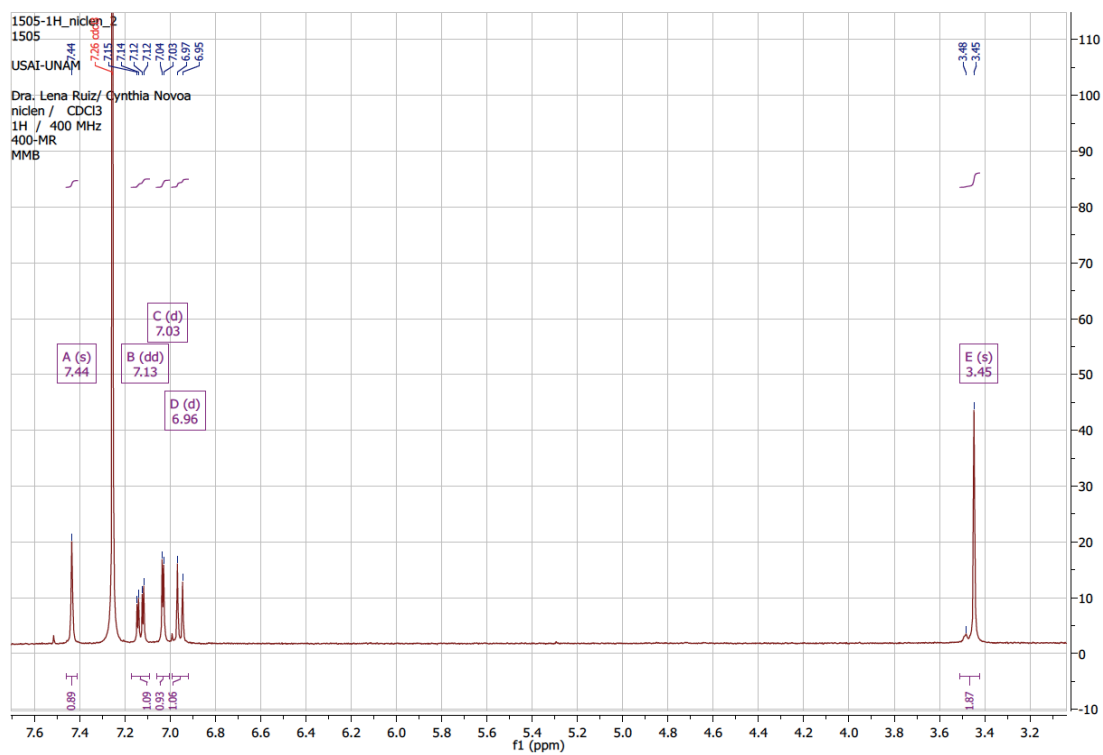

Figure S31. <sup>1</sup>H-NMR of NaClIsalen in chloroform.

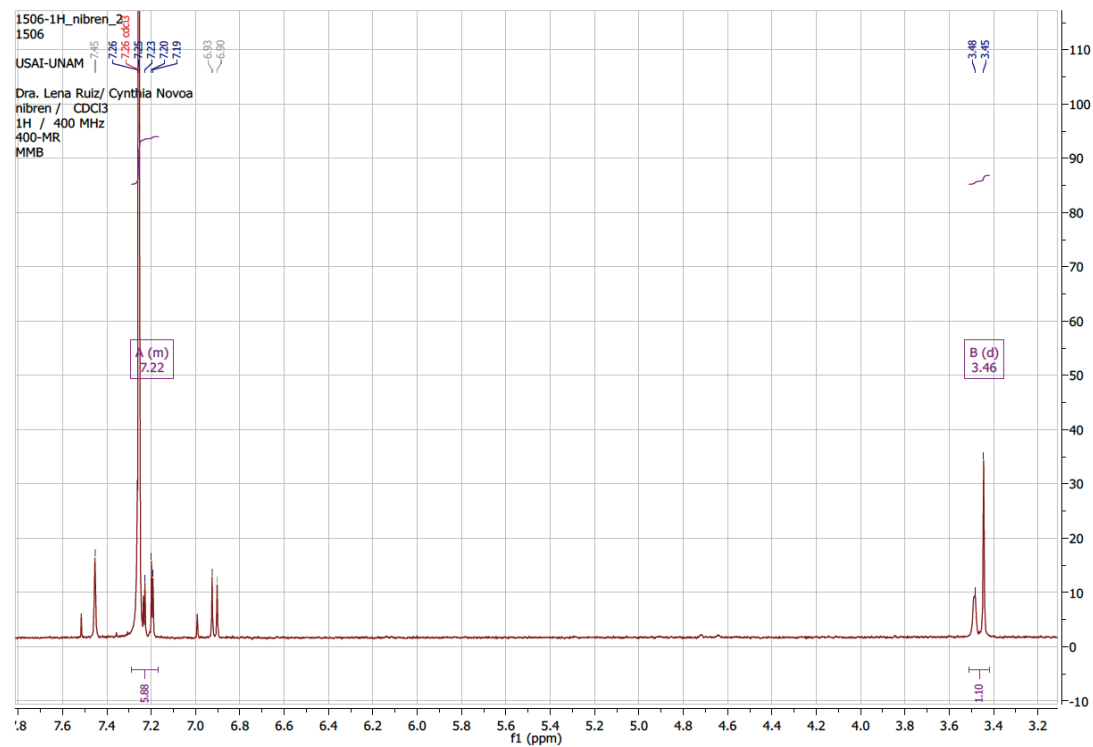

Figure S32. <sup>1</sup>H-NMR of NiBrIsalen in chloroform.

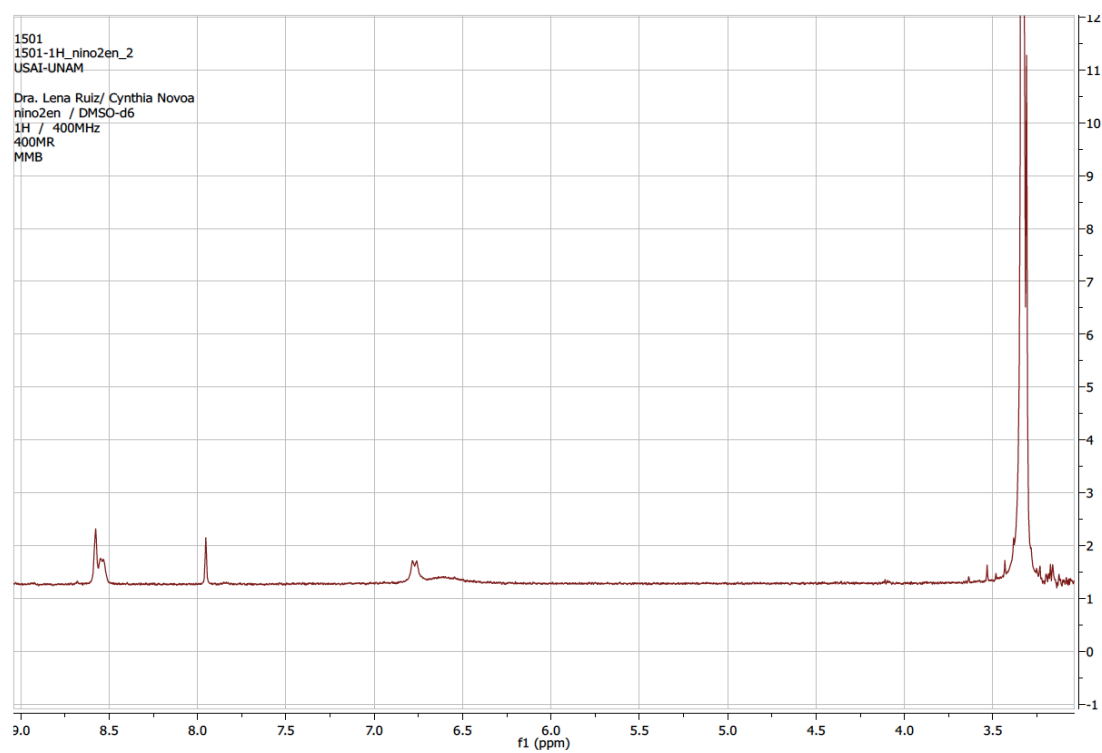

Figure S33.  $^1\text{H}$ -NMR of  $\text{NiNO}_2\text{salen}$  in  $\text{DMSO-d}_6$ .

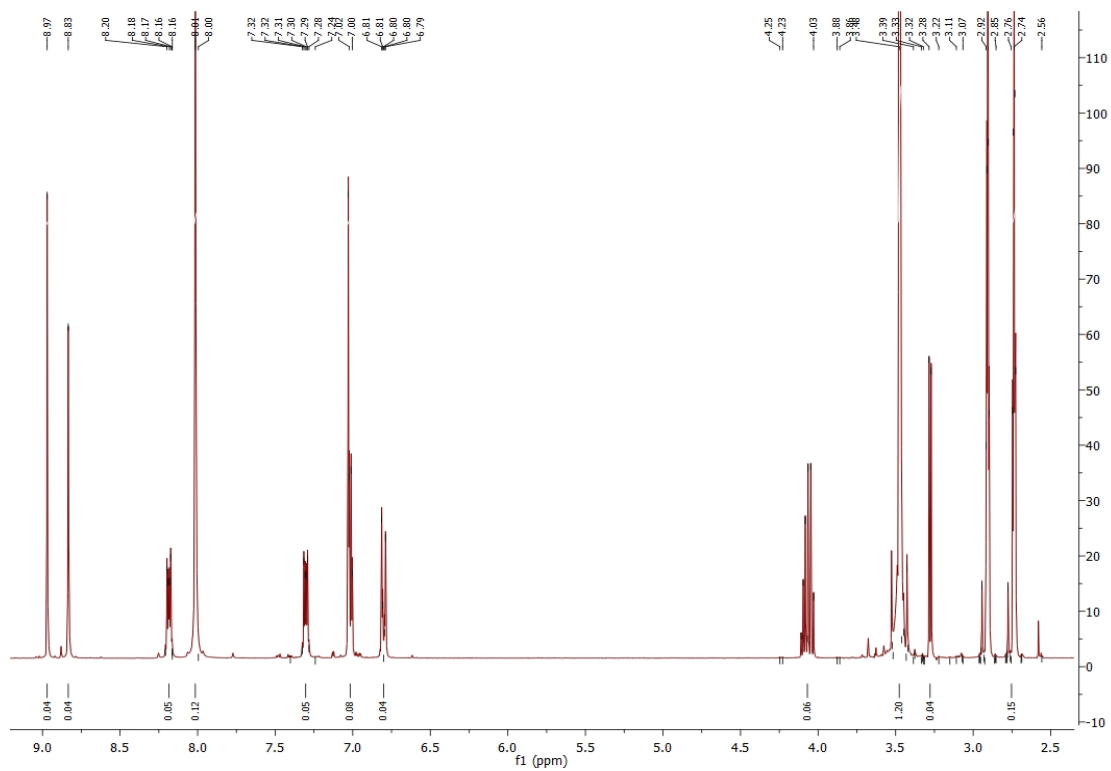

Figure S34.  $^1\text{H}$ -NMR of  $\text{NiOHsalphen}$  in  $\text{DMF-d}_7$ .

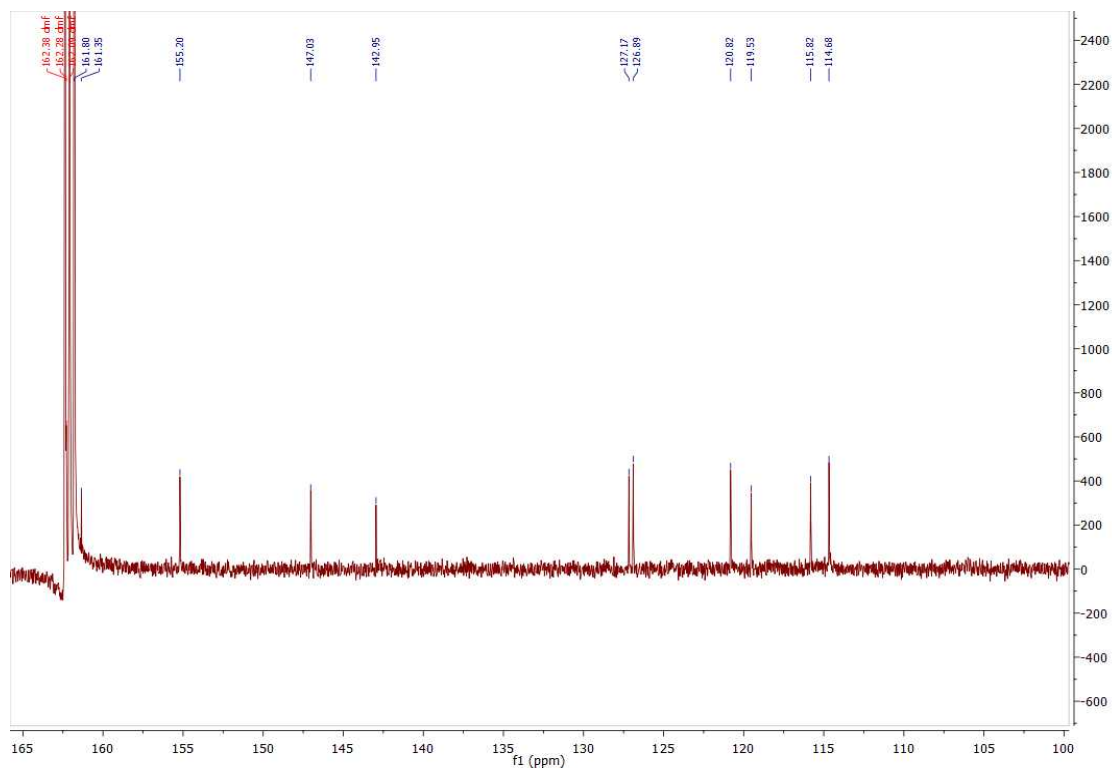

Figure S35.  $^{13}\text{C}$ -NMR of NiOHsalphen in DMF-d<sub>7</sub>.

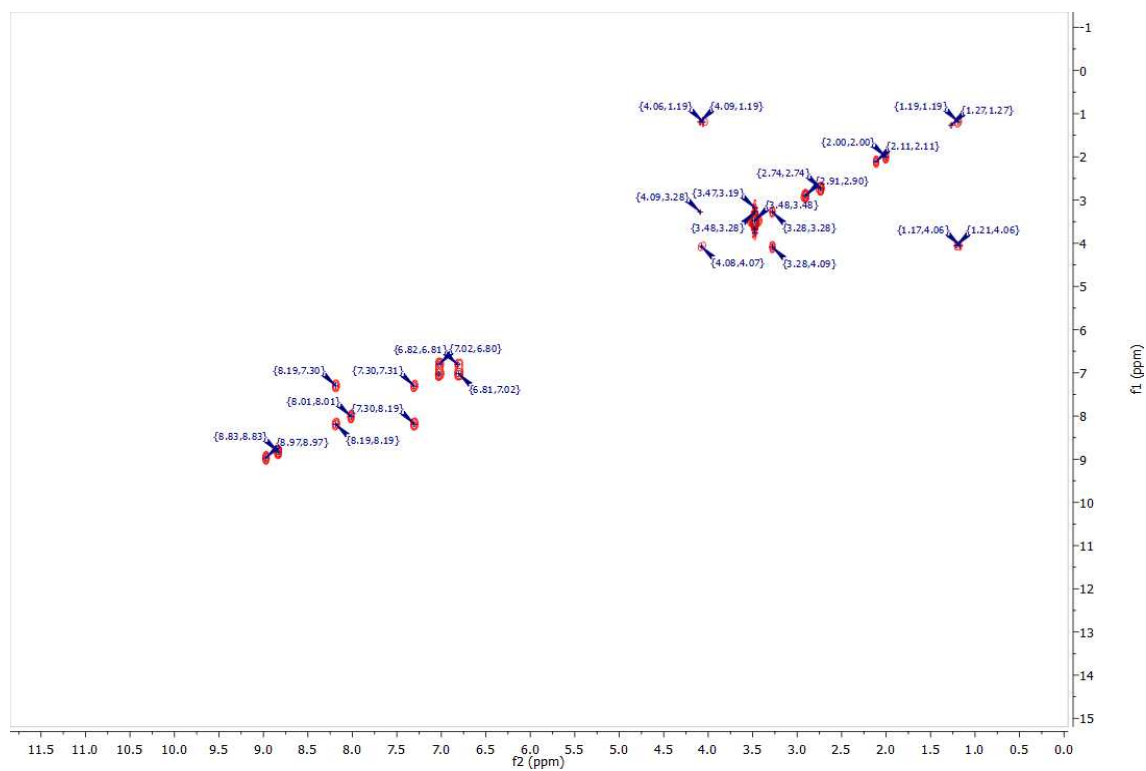

Figure S36. COSY spectrum of NiOHsalphen in DMF-d<sub>7</sub>.



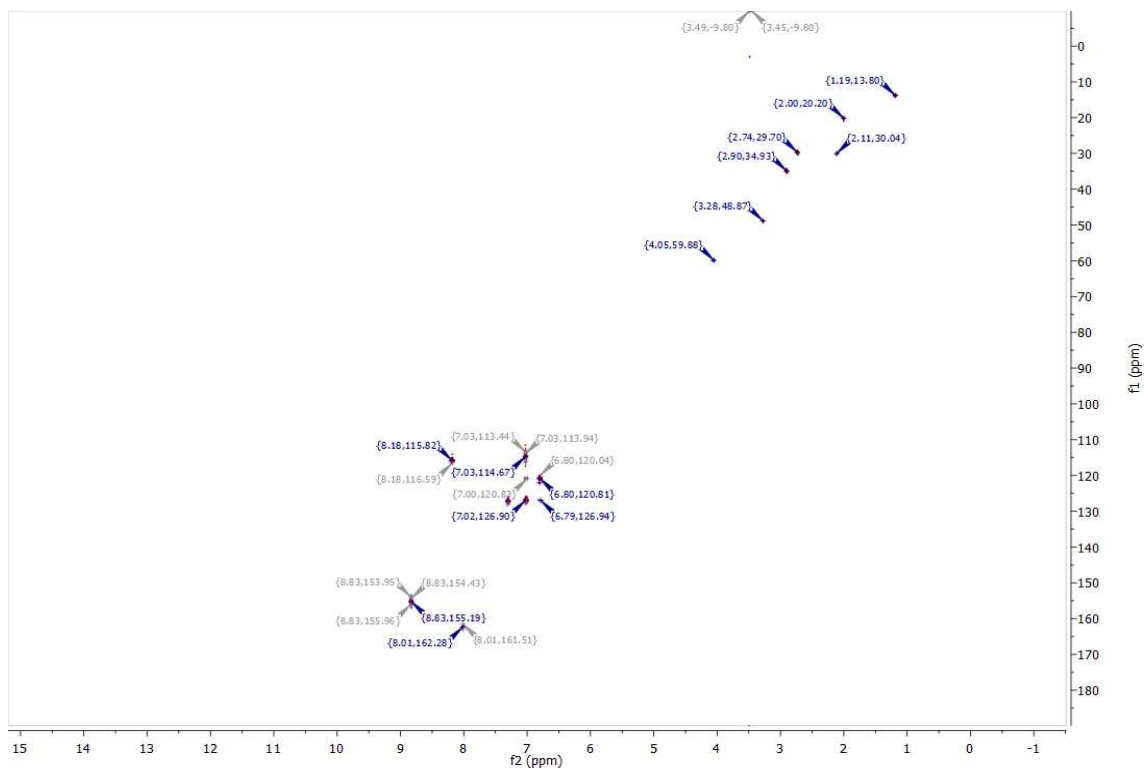

Figure S37. HSQC spectrum of NiOHsalphen in DMF-d7.

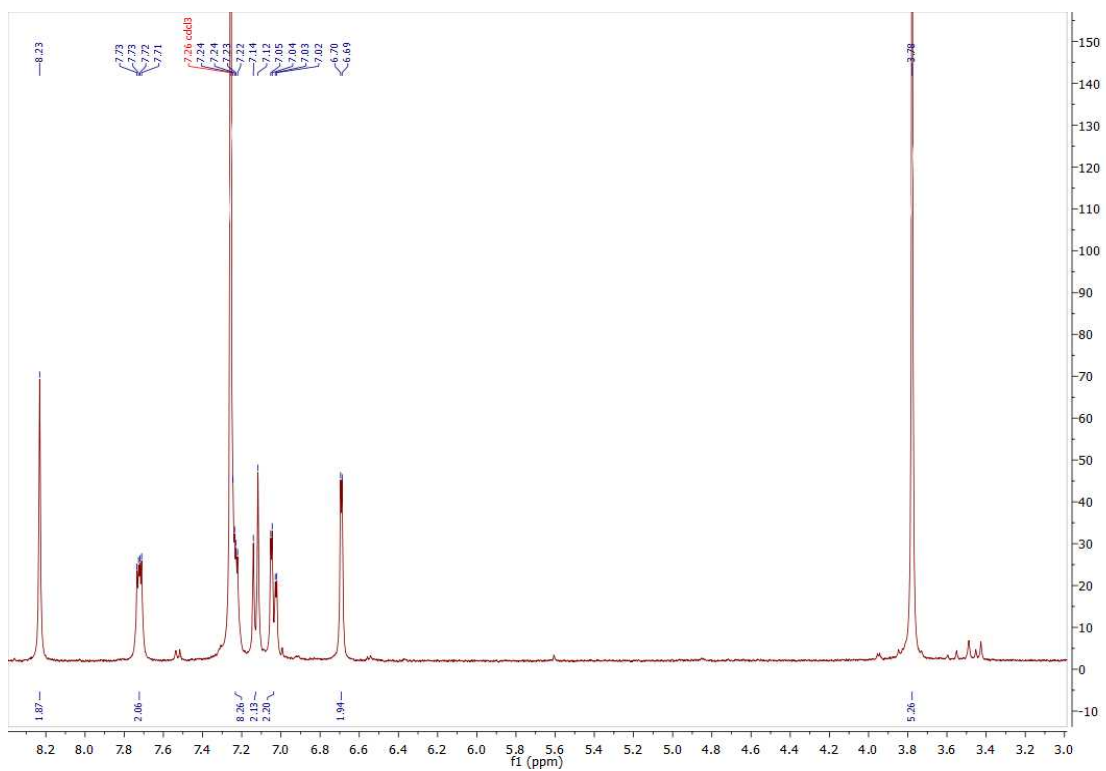

Figure S38.  $^1\text{H}$ -NMR of NiMeOsalphen in chloroform.

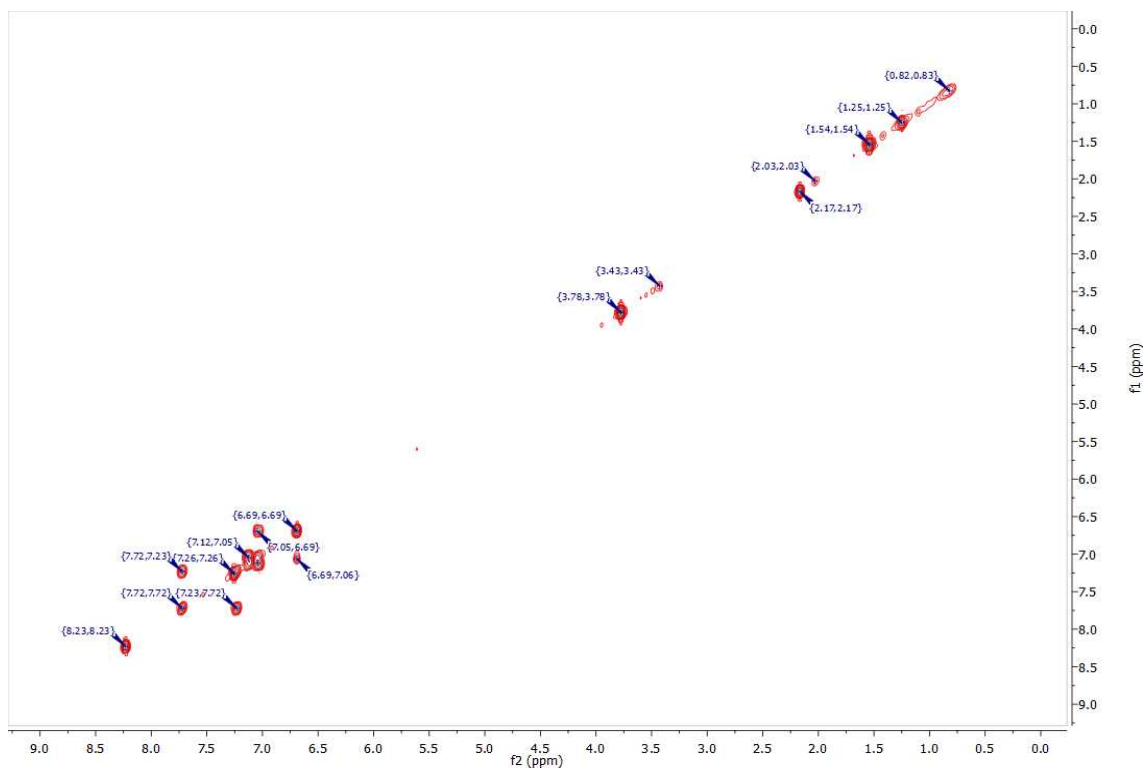

Figure S39. COSY spectrum of NiMeOsalphen in chloroform.

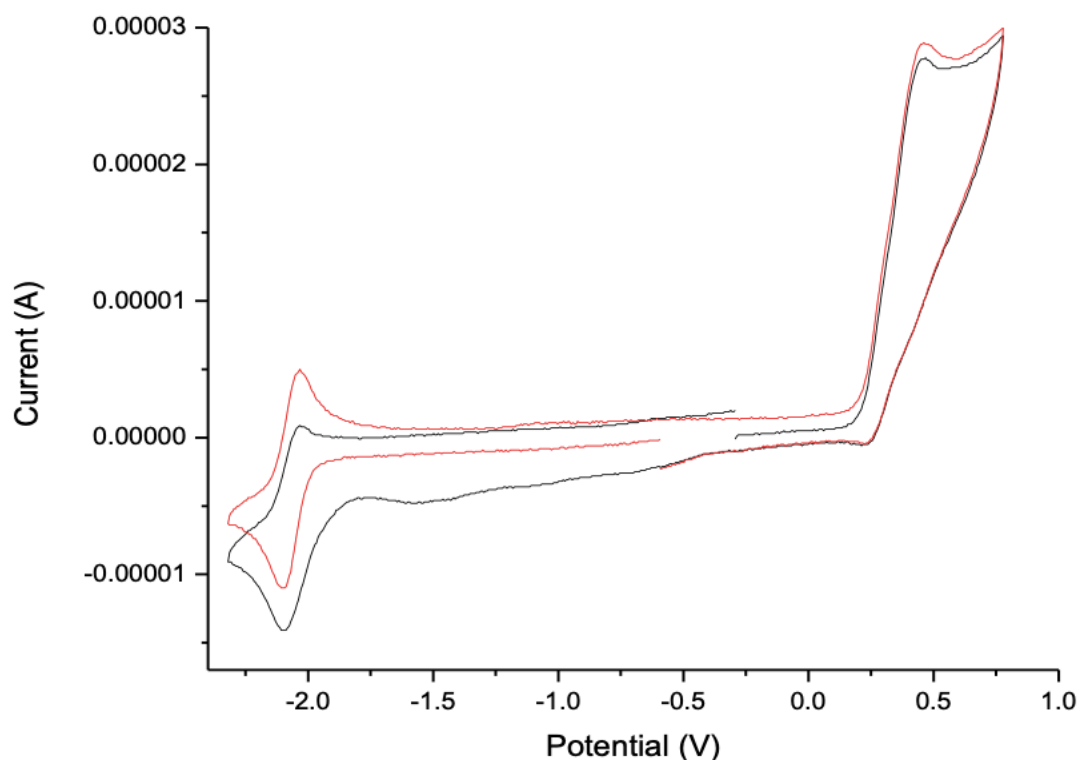

Figure S40. Voltammogram of NiMeOsalen 1 mM in DMSO at 100 mV.

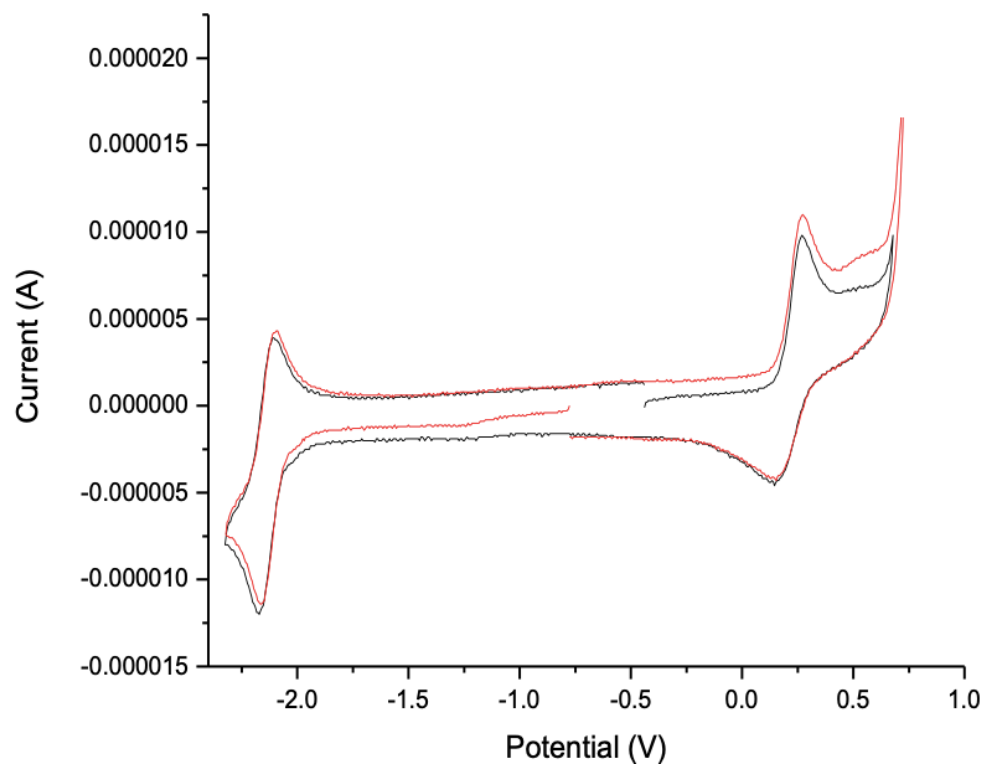

**Figure S41.** Voltammogram of NiMesalen 1 mM in DMSO at 100 mV.

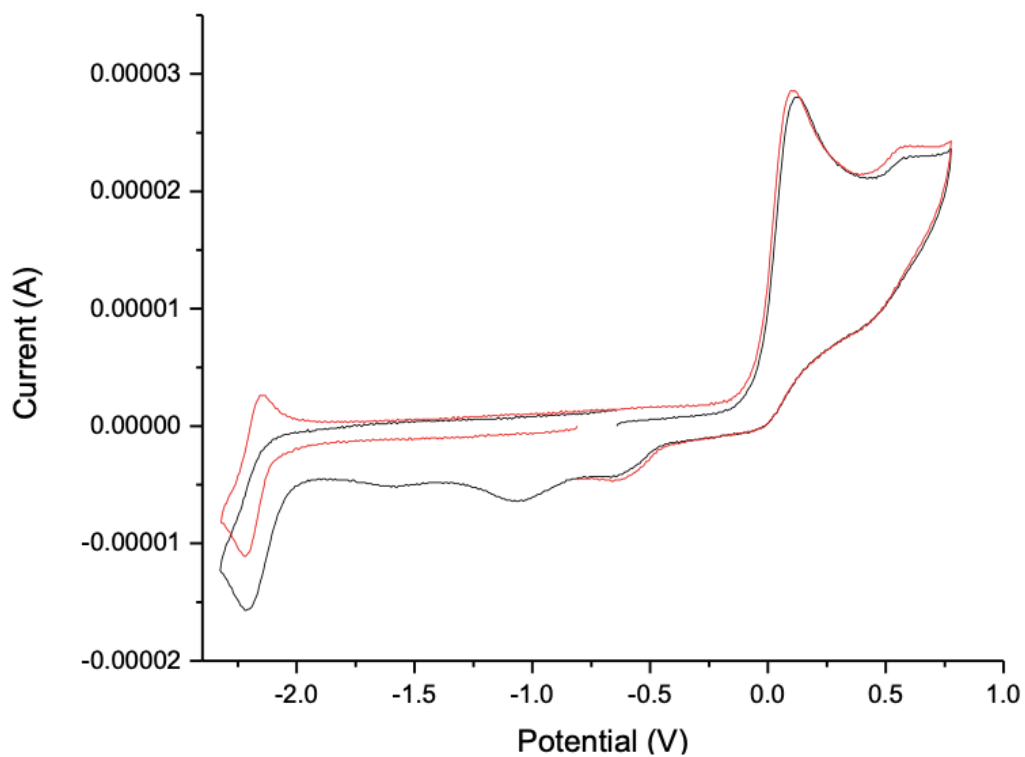

**Figure S42.** Voltammogram of NiOHsalen 1 mM in DMSO at 100 mV.

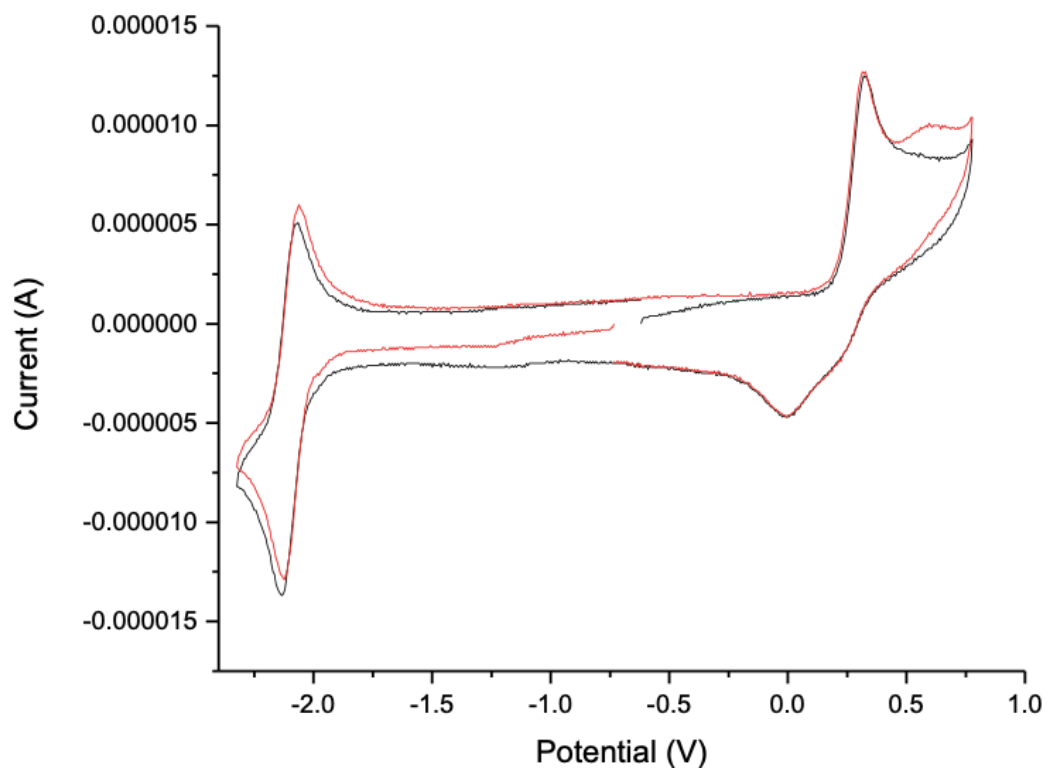

Figure S43. Voltammogram of Nisalen 1 mM in DMSO at 100 mV.

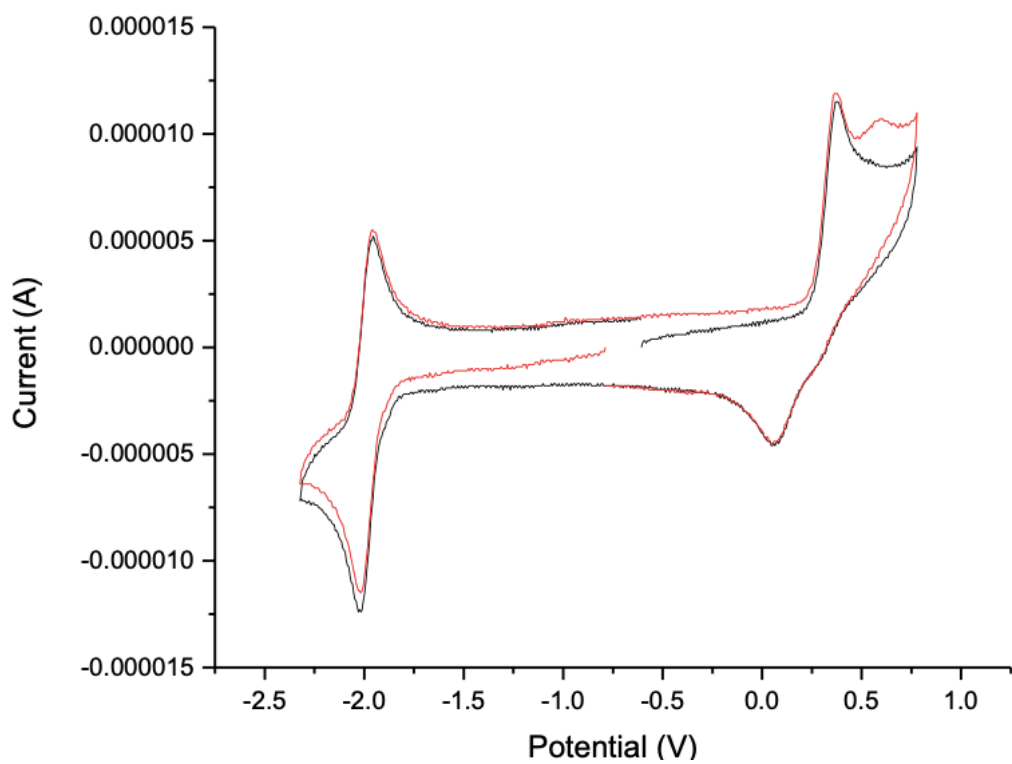

Figure S44. Voltammogram of NiClsalen 1 mM in DMSO at 100 mV.

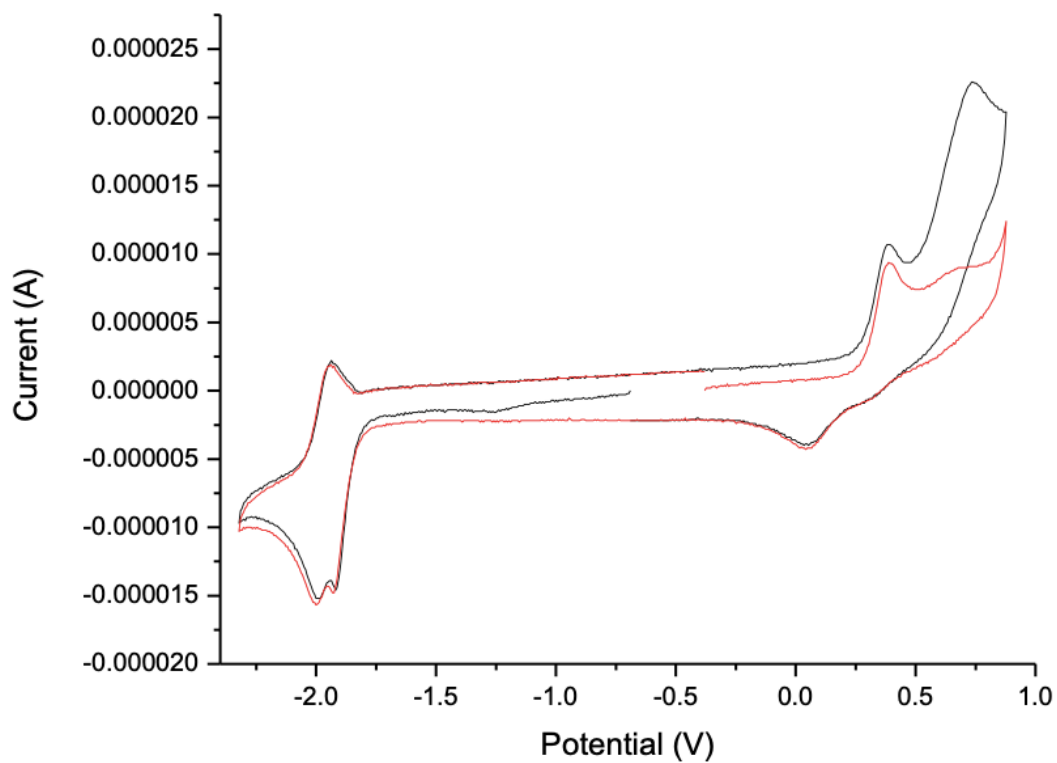

Figure S45. Voltammogram of NiBrsalen 1 mM in DMSO at 100 mV.

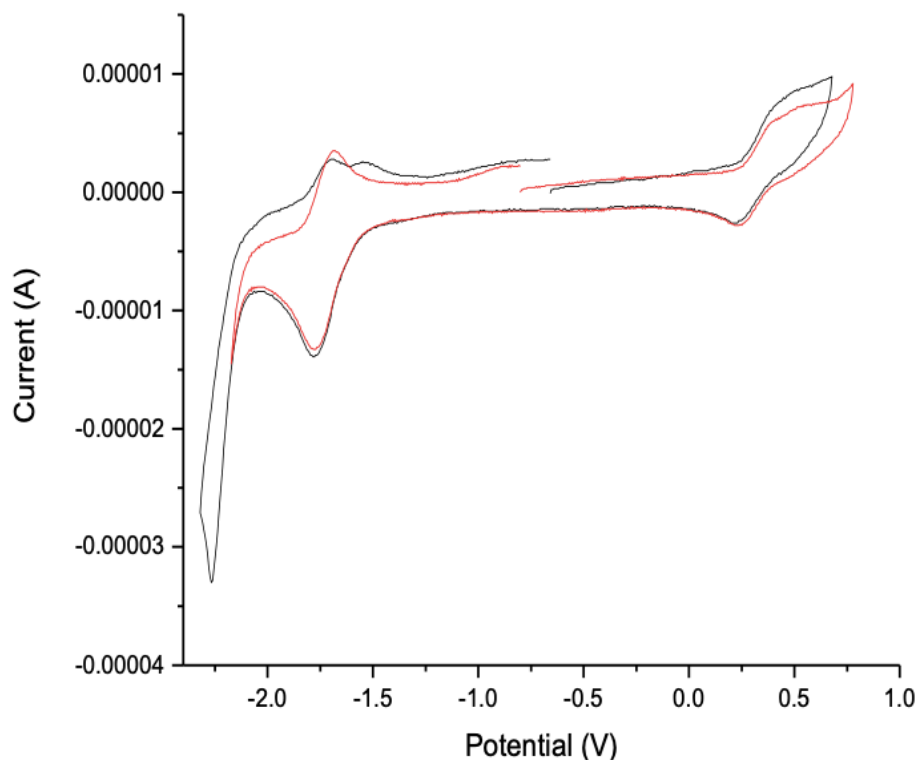

Figure S46. Voltammogram of NiNO<sub>2</sub>salen 1 mM in DMSO at 100 mV.
